# Supplementary material for: Adaptation and High Yield Performance of Honglian Type Hybrid Rice in Pakistan with Desirable Agricultural Traits
Source: MDPI journal article supplement (doi:10.3390/agriculture13020242), 2023-01-19
Supplement: s1 [file s1]

**Supplementary Table S1 (Part-I): Means of Paddy Yield (kg/ha) of Rice Hybrids Evaluated in NUYT during Kharif, 2020**

| Sr. No. | Hybrids Name | Decoded Name  | RRI, KSK | RRI, Dokri | PARC, KSK | GUARD, Golarchi | Four Brothers, Multan | Emkay, Shiekhupura | CKD, DG Khan | Avg Yield   |
|---------|--------------|---------------|----------|------------|-----------|-----------------|-----------------------|--------------------|--------------|-------------|
| 1       | R 20001      | ANMOL         | 8739     | 8680       | 7631      | 9750            | 9595                  | 7513               | 8010         | <b>8560</b> |
| 2       | R 20003      | SC-415        | 9283     | 9317       | 8380      | 11313           | 7720                  | 7604               | 6854         | <b>8639</b> |
| 3       | R 20005      | NAUBAHAR-110  | 8079     | 9270       | 8129      | 10125           | 11329                 | 7633               | 7676         | <b>8892</b> |
| 4       | R 20009      | FB-39         | 10002    | 9178       | 6952      | 12250           | 11825                 | 8024               | 8432         | <b>9523</b> |
| 5       | R 20010      | Rachna-415    | 7707     | 9247       | 6446      | 8688            | 11297                 | 8111               | 9365         | <b>8695</b> |
| 6       | R 20011      | CNRRI-17-17   | 8712     | 9571       | 6020      | 11125           | 7157                  | 7507               | 8832         | <b>8418</b> |
| 7       | R 20013      | LH-118        | 7450     | 9247       | 6810      | 7813            | 6332                  | 7147               | 7343         | <b>7449</b> |
| 8       | R 20015      | SC-128        | 9103     | 9930       | 6082      | 10188           | 8806                  | 7541               | 8476         | <b>8590</b> |
| 9       | R 20033      | TARA-1732     | 9205     | 9815       | 8020      | 11375           | 8951                  | 7868               | 8387         | <b>9089</b> |
| 10      | R 20035      | LPSA-03       | 8234     | 9004       | 7495      | -               | 8620                  | 7733               | 8254         | <b>8224</b> |
| 11      | R 20037      | Generation    | 7544     | 9386       | 6375      | 10500           | 12502                 | 7361               | 9054         | <b>8960</b> |
| 12      | R 20040      | D-121 (check) | 9038     | 9699       | 7586      | 12500           | 9488                  | 7632               | 8254         | <b>9171</b> |
| 13      | R 20041      | Sitara-404    | 9739     | 10032      | 7591      | 11750           | 8575                  | 7441               | 9276         | <b>9201</b> |
| 14      | R 20044      | LPSA-08       | 9473     | 9872       | 6707      | 11438           | 10263                 | 7890               | 7032         | <b>8954</b> |
| 15      | R 20046      | HP-3          | 9276     | 9467       | 7101      | 11188           | 11058                 | 7311               | 9965         | <b>9338</b> |
| 16      | R 20100      | AA-2396       | 9074     | 9675       | 6120      | 13938           | 9717                  | 7364               | 8321         | <b>9173</b> |
| 17      | R 20101      | EG-1908       | 8905     | 9607       | 7320      | 10000           | 11819                 | 7927               | 8143         | <b>9103</b> |
| 18      | R 20103      | VGro-315      | 7798     | 9652       | 7263      | 10875           | 9722                  | 7732               | 8698         | <b>8820</b> |
| 19      | R 20105      | Ennova-77     | 8968     | 9502       | 6826      | 11688           | 13045                 | 7564               | 9521         | <b>9588</b> |
| 20      | R 20107      | HSP-21        | 9061     | 9618       | 6899      | -               | 11857                 | 7824               | 10032        | <b>9215</b> |
| 21      | R 20109      | HP-2          | 8461     | 9791       | 6554      | 10750           | 9818                  | 7555               | 8898         | <b>8833</b> |
| 22      | R 20111      | US-125        | 8361     | 9409       | 6675      | 11438           | 8189                  | 7717               | 8810         | <b>8657</b> |
| 23      | R 20113      | Nawaz-21      | 9476     | 9316       | 7867      | 11063           | 13299                 | 7883               | 9365         | <b>9753</b> |

|    |         |                 |      |      |      |       |       |      |       |             |
|----|---------|-----------------|------|------|------|-------|-------|------|-------|-------------|
| 24 | R 20115 | CD-34           | 7594 | 9839 | 5473 | 10938 | 9546  | 7447 | 10298 | <b>8734</b> |
| 25 | R 20117 | HSP-19          | 7806 | 9675 | 6882 | 7875  | 13501 | 7441 | 8187  | <b>8767</b> |
| 26 | R 20119 | LUS-250         | 6716 | 9838 | 7945 | 9188  | 9076  | 7643 | 9121  | <b>8504</b> |
| 27 | R 20120 | ASW-505         | 9354 | 9467 | 6250 | 13375 | 8559  | 7585 | 9832  | <b>9203</b> |
| 28 | R 20121 | TEG-111         | 8541 | 9641 | 7333 | 9750  | 9421  | 7393 | 8076  | <b>8594</b> |
| 29 | R 20123 | 2050            | 8925 | 9756 | 6572 | 7125  | 8398  | 7386 | 8498  | <b>8094</b> |
| 30 | R 20125 | Topson<br>Risor | 8339 | 8680 | 7586 | 10000 | 11755 | 7479 | 8503  | <b>8906</b> |
| 31 | R 20127 | VGRO-177        | 8790 | 9710 | 7026 | 8625  | 9425  | 7237 | 7413  | <b>8318</b> |
| 32 | R 20129 | Winner-66       | 8238 | 9328 | 7294 | 9688  | 11295 | 7235 | 5125  | <b>8315</b> |
| 33 | R 20131 | HSP-20          | 9734 | 9675 | 7499 | 12313 | 9265  | 8112 | 7658  | <b>9180</b> |
| 34 | R 20133 | One-01-Plus     | 7581 | 8358 | 7009 | 11563 | 8755  | 7368 | 5555  | <b>8027</b> |
| 35 | R 20135 | OS-167          | 9365 | 9918 | 5816 | 11625 | 12372 | 7652 | 5605  | <b>8908</b> |
| 36 | R 20138 | Tara-1728       | 9594 | 9351 | 5547 | 16000 | 9488  | 8074 | 6725  | <b>9254</b> |
| 37 | R 20140 | LPSA-04         | 8602 | 9491 | 6857 | 12375 | 10141 | 8756 | 5769  | <b>8856</b> |
| 38 | R 20141 | OS-166          | 8704 | 8566 | 6513 | 11250 | 10848 | 7348 | 6436  | <b>8524</b> |
| 39 | R 20143 | Chandani        | 9086 | 9386 | 7093 | 11438 | 11628 | 7494 | 6836  | <b>8994</b> |
| 40 | R 20145 | Tara-2001       | 9932 | 9708 | 7891 | 13438 | 9432  | 7905 | 6102  | <b>9201</b> |
| 41 | R 20147 | LPSA-07         | 9639 | 9062 | 6061 | 11125 | 8690  | 8028 | 5969  | <b>8368</b> |
| 42 | R 20149 | Uqaab-101       | 8664 | 8969 | 6894 | 13063 | 9866  | 7868 | 5947  | <b>8753</b> |
| 43 | R 20150 | AA2376          | 9964 | 9247 | 7563 | 12500 | 10719 | 7972 | 6436  | <b>9200</b> |
| 44 | R 20151 | Madina-F1       | 8690 | 9571 | 7300 | 13250 | 9522  | 7894 | 5725  | <b>8850</b> |
| 45 | R 20153 | Shaheen-18      | 8999 | 9632 | 6272 | 11250 | 10303 | 7483 | 6725  | <b>8666</b> |
| 46 | R 20155 | KF-801          | 9484 | 9432 | 7088 | 13125 | 6501  | 8042 | 6310  | <b>8569</b> |
| 47 | R 20157 | 2051            | 9968 | 9386 | 6234 | 10000 | 7948  | 7496 | 7436  | <b>8352</b> |
| 48 | R 20159 | HSP-18          | 9238 | 9455 | 5962 | 11875 | 7274  | 7419 | 4113  | <b>7905</b> |
| 49 | R 20161 | SS-2020         | 9347 | 9421 | 6563 | 11375 | 9196  | 7395 | 6125  | <b>8489</b> |

|    |         |                     |      |      |      |       |       |      |      |             |
|----|---------|---------------------|------|------|------|-------|-------|------|------|-------------|
| 50 | R 20165 | KF-1398             | 8109 | 9722 | 6727 | 12438 | 8828  | 7509 | 6347 | <b>8526</b> |
| 51 | R 2017  | Topson-111          | 9243 | 9259 | 6916 | 11250 | 11851 | 8200 | 6569 | <b>9041</b> |
| 52 | R 20170 | Arroze              | 8202 | 9614 | 6532 | 12188 | 8065  | 7413 | 6102 | <b>8302</b> |
| 53 | R 20173 | FMC-3               | 9487 | 9108 | 7083 | 12125 | 7465  | 7453 | 6680 | <b>8486</b> |
| 54 | R 20175 | Guard-53<br>(check) | 8981 | 9513 | 7275 | 12000 | 6898  | 6771 | 7325 | <b>8395</b> |
| 55 | R 20179 | Tara-2002           | 9604 | 9375 | 6583 | 12063 | 8279  | 7273 | 5769 | <b>8421</b> |
| 56 | R 20180 | Tara-1730           | 8475 | 9328 | 7003 | 13375 | 10271 | 7470 | 6680 | <b>8943</b> |
| 57 | R 20181 | Safa-F1             | 8564 | 9502 | 6783 | 12000 | 9490  | 7299 | 9702 | <b>9049</b> |
| 58 | R 20183 | LPSA-06             | 8599 | 9421 | 6490 | 13250 | 9626  | 7472 | 7413 | <b>8896</b> |
| 59 | R 20185 | 16001               | 6810 | 9398 | 6385 | 9500  | 5303  | 6476 | 7080 | <b>7279</b> |
| 60 | R 2019  | Yg-20               | 6456 | 9872 | 6989 | 13125 | 7747  | 7740 | 8007 | <b>8562</b> |
| 61 | R 20190 | PAPA-HR-02          | 8154 | 9294 | 7234 | 13375 | 8852  | 7521 | 7495 | <b>8847</b> |
| 62 | R 20191 | LPSA-09             | 8236 | 9198 | 7256 | 11563 | 9281  | 7627 | 9251 | <b>8916</b> |
| 63 | R 20193 | Murk-101            | 8633 | 9502 | 6373 | 13313 | 7561  | 7705 | 6562 | <b>8521</b> |
| 64 | R 20195 | Prince-433          | 8030 | 9918 | 6621 | 12375 | 7843  | 8099 | 6895 | <b>8540</b> |
| 65 | R 20197 | Arisco-91           | 9118 | 9386 | 7623 | 13000 | 8788  | 7834 | 8629 | <b>9197</b> |
| 66 | R 20199 | ASW-503             | 7324 | 8963 | 7086 | 14250 | 9798  | 7354 | 7229 | <b>8858</b> |
| 67 | R 2020  | CD-32               | 8587 | 9552 | 7106 | 12625 | 8076  | 7356 | 7429 | <b>8676</b> |
| 68 | R 2022  | HSP-22              | 7925 | 9201 | 6501 | 12375 | 11061 | 7028 | 8051 | <b>8877</b> |
| 69 | R 2024  | HP-1                | 8141 | 9780 | 7535 | 12000 | 8924  | 7041 | 7540 | <b>8709</b> |
| 70 | R 2026  | LS-115              | 6885 | 9617 | 5400 | 11563 | 8504  | 7054 | 5750 | <b>7825</b> |
| 71 | R 2027  | TEG-786             | 8100 | 8830 | 5807 | 12000 | 7848  | 7664 | 7940 | <b>8313</b> |
| 72 | R 2029  | KF-911              | 8443 | 9467 | 6332 | 11000 | 8405  | 8069 | 7718 | <b>8490</b> |
| 73 | R 2030  | PAPA-HR-01          | 9176 | 9339 | 5624 | 11750 | 9493  | 7487 | 8673 | <b>8792</b> |
| 74 | R 2048  | 13076               | 6236 | 9085 | 6122 | 10625 | 6498  | 6293 | 7118 | <b>7425</b> |
| 75 | R 2050  | FMC-4               | 9181 | 9409 | 7104 | 10438 | 9639  | 7588 | 8051 | <b>8773</b> |

|     |         |                     |      |       |      |       |       |      |      |             |
|-----|---------|---------------------|------|-------|------|-------|-------|------|------|-------------|
| 76  | R 2053  | FB-3086             | 7563 | 9514  | 7053 | 10125 | 9283  | 7318 | 4673 | <b>7933</b> |
| 77  | R 2055  | Kisan-07            | 9612 | 9837  | 6074 | 10875 | 8299  | 7578 | 8784 | <b>8723</b> |
| 78  | R 2057  | CNRRI-17-19         | 7554 | 9467  | 7182 | 8563  | 8400  | 7282 | 8295 | <b>8106</b> |
| 79  | R 2059  | Sunrise Super       | 9203 | 10104 | 7226 | 9625  | 7849  | 8064 | 7473 | <b>8506</b> |
| 80  | R 2061  | Naubahar Super Gold | 5169 | 9537  | 6322 | 6625  | 9033  | 6574 | 9473 | <b>7533</b> |
| 81  | R 2063  | EG-1907             | 9986 | 9189  | 6415 | 10375 | 9089  | 7579 | 6695 | <b>8476</b> |
| 82  | R 2065  | FB-1802             | 9012 | 9930  | 7071 | 9750  | 9156  | 8167 | 7673 | <b>8680</b> |
| 83  | R 2067  | Naubahar IQS-749    | 9501 | 9536  | 7303 | 9938  | 10093 | 7814 | 8051 | <b>8891</b> |
| 84  | R 2069  | EG-1904             | 9236 | 9930  | 6535 | 10875 | 10420 | 7494 | 7562 | <b>8864</b> |
| 85  | R 2070  | CNRRI-17-08         | 8439 | 9178  | 5190 | 11688 | 9238  | 7534 | 8762 | <b>8575</b> |
| 86  | R 2071  | FB-53               | 9580 | 9085  | 6859 | 11500 | 10921 | 8121 | 9162 | <b>9318</b> |
| 87  | R 2073  | Rachna-414          | 9160 | 9687  | 7057 | 10375 | 12280 | 7628 | 7473 | <b>9094</b> |
| 88  | R 2075  | SC-156              | 9180 | 9467  | 5927 | 10875 | 12048 | 7150 | 4607 | <b>8465</b> |
| 89  | R 2077  | Naubahar-786        | 8545 | 9722  | 5245 | 10688 | 9732  | 7563 | 6695 | <b>8313</b> |
| 90  | R 2079  | EG-1906             | 9365 | 9120  | 5932 | 12500 | 9573  | 8202 | 8261 | <b>8993</b> |
| 91  | R 2081  | SC-130              | 8593 | 9285  | 6859 | 11250 | 9740  | 7791 | 6639 | <b>8594</b> |
| 92  | R 2083  | FB-1902             | 8600 | 9537  | 6770 | 10125 | 9418  | 7439 | 5772 | <b>8237</b> |
| 93  | R 2085  | CNRRI-17-11         | 8492 | 9710  | 7316 | 9750  | 8501  | 7679 | 7639 | <b>8441</b> |
| 94  | R 2088  | BKT-275             | 9791 | 9455  | 6747 | 7375  | 9331  | 7603 | 5305 | <b>7944</b> |
| 95  | R 2090  | EG-1901             | 7512 | 9409  | 6505 | 11063 | 9721  | 7588 | 3550 | <b>7907</b> |
| 96  | R 2091  | SC-170              | 9212 | 9536  | 6996 | 10500 | 9649  | 8324 | 5572 | <b>8541</b> |
| 97  | R 2093  | CR-509              | 9015 | 9120  | 6502 | 11125 | 9544  | 8069 | 5928 | <b>8472</b> |
| 98  | R 2095  | CNRRI-17-18         | 7869 | 9502  | 6562 | 10000 | 8925  | 7958 | 4594 | <b>7916</b> |
| 99  | R 2097  | Sunrise Wonder      | 8271 | 9537  | 6607 | 8500  | 9485  | 8244 | 5217 | <b>7980</b> |
| 100 | R 2099  | Millet Rice         | 8114 | 9375  | 7079 | 10375 | 9987  | 7579 | 4705 | <b>8173</b> |
| 101 | R 20261 | CKD-3185            | 8441 | 9583  | 7526 | 7313  | 10480 | 6798 | 4505 | <b>7807</b> |

|     |         |                    |             |             |             |              |             |             |             |             |
|-----|---------|--------------------|-------------|-------------|-------------|--------------|-------------|-------------|-------------|-------------|
| 102 | R 20263 | CKD-3188           | 7286        | 9189        | 6882        | -            | 8076        | 6639        | 4817        | <b>7148</b> |
| 103 | R 20265 | CKD-3274           | 8718        | 9201        | 6699        | -            | 11840       | 7681        | 6039        | <b>8363</b> |
| 104 | R 20267 | CKD-3275           | 8926        | 9201        | 6580        | -            | 9736        | 8247        | 6328        | <b>8170</b> |
|     |         | <b>Average</b>     | <b>8627</b> | <b>9447</b> | <b>6797</b> | <b>11123</b> | <b>9501</b> | <b>7592</b> | <b>7306</b> | <b>8608</b> |
|     |         | <b>LSD (0.050)</b> | 617         | 937         | 890         | 590          | 970         | 735         | 923         |             |
|     |         | <b>CV (%)</b>      | 4.3         | 7.6         | 5.6         | 3.5          | 12          | 2.4         | 9.5         |             |

**Supplementary Table S1 (Part-II). Quality data of NUYT 2020  
Hybrids Rice**

| <b>Sr #</b> | <b>Variety</b> | <b>Decode Name</b> | <b>Length (mm)</b> | <b>Width (mm)</b> | <b>L/W Ratio</b> | <b>Thickness (mm)</b> | <b>Stickiness</b> | <b>Curling (%)</b> | <b>Bursting (%)</b> | <b>C.G. L (mm)</b> | <b>Brown Rice (%)</b> | <b>Milled Rice (%)</b> | <b>Head Rice (%)</b> |
|-------------|----------------|--------------------|--------------------|-------------------|------------------|-----------------------|-------------------|--------------------|---------------------|--------------------|-----------------------|------------------------|----------------------|
| 1           | R-20001        | ANMOL              | 6.8                | 2                 | 3.4              | 1.76                  | sticky            | 7                  | 9                   | 10.2               | 83.2                  | 76.3                   | 64.4                 |
| 2           | R-20003        | SC-415             | 6.7                | 2.04              | 3.28             | 1.76                  | sticky            | 2                  | 8                   | 9.8                | 82.3                  | 76.2                   | 65.2                 |
| 3           | R-20005        | NAUBAHAR-110       | 7.14               | 2.11              | 3.38             | 1.8                   | sticky            | 4                  | 14                  | 8.9                | 82.6                  | 77.7                   | 58.3                 |
| 4           | R-20009        | FB-39              | 6.65               | 2.06              | 3.22             | 1.73                  | sticky            | 5                  | 10                  | 9.8                | 84                    | 76.2                   | 65.5                 |
| 5           | R-20010        | Rachna-415         | 6.64               | 2.12              | 3.13             | 1.84                  | sticky            | 5                  | 24                  | 10                 | 82.6                  | 76                     | 53.4                 |
| 6           | R-20011        | CNRRI-17-17        | 6.2                | 1.91              | 3.25             | 1.62                  | sticky            | 5                  | 14                  | 9.8                | 82                    | 73                     | 64.6                 |
| 7           | R-20013        | LH-118             | 7.28               | 1.84              | 3.96             | 1.7                   | sticky            | 5                  | 13                  | 12.2               | 84                    | 75.6                   | 62.6                 |
| 8           | R-20015        | SC-128             | 6.78               | 2                 | 3.39             | 1.76                  | sticky            | 3                  | 4                   | 11.2               | 80                    | 73.8                   | 63.2                 |
| 9           | R-20033        | TARA-1732          | 6.46               | 1.9               | 3.4              | 1.63                  | sticky            | 5                  | 20                  | 9.8                | 82.8                  | 76                     | 65.8                 |
| 10          | R 20035        | LPSA-03            | -                  | -                 | -                | -                     | -                 | -                  | -                   | -                  | -                     | -                      | -                    |
| 11          | R-20037        | Generation         | 6.77               | 1.94              | 3.39             | 1.75                  | sticky            | 5                  | 15                  | 11                 | 82                    | 78.5                   | 57                   |
| 12          | R-20040        | D-121 (check)      | 6.72               | 1.98              | 3.4              | 1.75                  | sticky            | 4                  | 7                   | 10.8               | 80                    | 73.3                   | 56.4                 |

|    |         |              |      |      |      |      |        |    |    |      |      |      |      |
|----|---------|--------------|------|------|------|------|--------|----|----|------|------|------|------|
| 13 | R-20041 | Sitara-404   | 6.65 | 2.04 | 3.26 | 1.7  | sticky | 8  | 9  | 10.6 | 81.4 | 78.9 | 57   |
| 14 | R-20044 | LPSA-08      | 6.46 | 1.94 | 3.33 | 1.7  | sticky | 5  | 10 | 10.2 | 83.4 | 75.6 | 66   |
| 15 | R-20046 | HP-3         | 6.8  | 2.11 | 3.22 | 1.76 | sticky | 2  | 4  | 10.3 | 84.4 | 79.4 | 61.2 |
| 16 | R-20100 | AA-2396      | 6.86 | 2.04 | 3.36 | 1.77 | sticky | 3  | 8  | 10.6 | 83   | 76.2 | 56.3 |
| 17 | R-20101 | EG-1908      | 6.63 | 2.02 | 3.28 | 1.76 | sticky | 3  | 14 | 10.5 | 82.3 | 75.3 | 60.3 |
| 18 | R-20103 | VGro-315     | 6.53 | 2.04 | 3.2  | 1.76 | sticky | 11 | 14 | 10.3 | 84.2 | 79.7 | 66   |
| 19 | R-20105 | Ennova-77    | 6.97 | 2    | 3.48 | 1.7  | sticky | 7  | 6  | 10.4 | 81.2 | 74.2 | 54.1 |
| 20 | R 20107 | HSP-21       | -    | -    | -    | -    | -      | -  | -  | -    | -    | -    | -    |
| 21 | R-20109 | HP-2         | 6.73 | 2.06 | 3.27 | 1.74 | sticky | 5  | 16 | 9.8  | 80.2 | 75   | 53.3 |
| 22 | R-20111 | US-125       | 7.14 | 1.9  | 3.75 | 1.68 | sticky | 9  | 10 | 9.4  | 82.6 | 78.3 | 58   |
| 23 | R-20113 | Nawaz-21     | 6.3  | 2.02 | 3.12 | 1.75 | sticky | 5  | 18 | 9.6  | 82.5 | 74.9 | 51.2 |
| 24 | R-20115 | CD-34        | 6.91 | 1.99 | 3.47 | 1.76 | sticky | 2  | 6  | 10.4 | 78.3 | 70.8 | 53.4 |
| 25 | R-20117 | HSP-19       | 6.8  | 2.01 | 3.38 | 1.79 | sticky | 4  | 15 | 11   | 77.8 | 66.7 | 52   |
| 26 | R-20119 | LUS-250      | 6.71 | 2.05 | 3.27 | 1.75 | sticky | 6  | 10 | 10.5 | 83   | 76.4 | 57.5 |
| 27 | R-20120 | ASW-505      | 6.45 | 1.98 | 3.25 | 1.71 | sticky | 6  | 8  | 9.9  | 84   | 79.2 | 63.4 |
| 28 | R-20121 | TEG-111      | 6.67 | 2.02 | 3.3  | 1.78 | sticky | 6  | 13 | 10.4 | 82.8 | 77.6 | 60.3 |
| 29 | R-20123 | 2050         | 6.43 | 1.84 | 3.49 | 1.61 | sticky | 8  | 20 | 9.2  | 84.4 | 75.2 | 55.3 |
| 30 | R-20125 | Topson Risor | 6.84 | 2.03 | 3.37 | 1.74 | sticky | 4  | 9  | 11   | 84   | 74.3 | 50.4 |
| 31 | R-20127 | VGRO-177     | 6.74 | 2.02 | 3.33 | 1.76 | sticky | 2  | 11 | 9.8  | 81.8 | 73.8 | 56.2 |
| 32 | R-20129 | Winner-66    | 6.71 | 2.06 | 3.26 | 1.76 | sticky | 5  | 14 | 10.2 | 80.7 | 75.7 | 55.7 |
| 33 | R-20131 | HSP-20       | 6.69 | 2.23 | 3    | 1.9  | sticky | 4  | 6  | 9.8  | 79.6 | 76.2 | 56.2 |

|    |         |             |      |      |      |      |        |    |    |      |      |      |      |
|----|---------|-------------|------|------|------|------|--------|----|----|------|------|------|------|
| 34 | R-20133 | One-01-Plus | 6.96 | 2.11 | 3.3  | 1.82 | sticky | 8  | 9  | 11   | 79.4 | 71.5 | 62.1 |
| 35 | R-20135 | OS-167      | 6.85 | 2.01 | 3.41 | 1.82 | sticky | 3  | 16 | 10.2 | 79.6 | 70.4 | 54.3 |
| 36 | R-20138 | Tara-1728   | 6.42 | 2.03 | 3.16 | 1.71 | sticky | 3  | 11 | 9.2  | 83   | 76.2 | 66.4 |
| 37 | R-20140 | LPSA-04     | 6.88 | 2    | 3.44 | 1.69 | sticky | 4  | 4  | 9    | 82.6 | 75.7 | 62.6 |
| 38 | R-20141 | OS-166      | 7.18 | 2.16 | 3.32 | 1.84 | sticky | 6  | 11 | 12   | 78.2 | 74.4 | 54.3 |
| 39 | R-20143 | Chandani    | 6.8  | 2.06 | 3.3  | 1.77 | sticky | 3  | 10 | 12   | 81.3 | 77.8 | 56.7 |
| 40 | R-20145 | Tara-2001   | 6.58 | 2.02 | 3.26 | 1.7  | sticky | 6  | 8  | 9.8  | 80.6 | 73   | 54.6 |
| 41 | R-20147 | LPSA-07     | 6.41 | 1.92 | 3.33 | 1.66 | sticky | 6  | 9  | 8.8  | 80.8 | 73.8 | 58   |
| 42 | R-20149 | Uqaab-101   | 6.69 | 2.05 | 3.26 | 1.79 | sticky | 2  | 5  | 10.7 | 74.6 | 70.2 | 51.4 |
| 43 | R-20150 | AA2376      | 6.87 | 2    | 3.43 | 1.77 | sticky | 8  | 7  | 9.7  | 82.8 | 75   | 60   |
| 44 | R-20151 | Madina-F1   | 6.83 | 2.02 | 3.38 | 1.76 | sticky | 7  | 16 | 11   | 81.4 | 68   | 50.7 |
| 45 | R-20153 | Shaheen-18  | 6.88 | 2.07 | 3.32 | 1.74 | sticky | 7  | 12 | 10   | 81   | 73   | 52.2 |
| 46 | R-20155 | KF-801      | 7.04 | 1.87 | 3.76 | 1.62 | sticky | 10 | 14 | 9.1  | 81.5 | 70.9 | 51.4 |
| 47 | R-20157 | 2051        | 6.8  | 2.03 | 3.35 | 1.76 | sticky | 2  | 2  | 11.4 | 83.3 | 76   | 52   |
| 48 | R-20159 | HSP-18      | 6.57 | 1.95 | 3.36 | 1.66 | sticky | 4  | 5  | 10   | 81.3 | 78   | 62.3 |
| 49 | R-20161 | SS-2020     | 6.96 | 180  | 3.87 | 1.57 | sticky | 4  | 5  | 10.3 | 78.4 | 67.4 | 50.8 |
| 50 | R-20165 | KF-1398     | 6.32 | 1.84 | 3.43 | 1.56 | sticky | 8  | 9  | 9.6  | 80.6 | 76.8 | 64.9 |
| 51 | R-2017  | Topson-111  | 6.85 | 2.05 | 3.34 | 1.76 | sticky | 3  | 4  | 10.6 | 79.2 | 71.5 | 50.4 |
| 52 | R-20170 | Arroze      | 6.58 | 2.04 | 3.22 | 1.73 | sticky | 6  | 8  | 9.9  | 79.5 | 74   | 57.4 |
| 53 | R-20173 | FMC-3       | 6.56 | 1.9  | 3.45 | 1.66 | sticky | 4  | 5  | 9.8  | 78.4 | 68.7 | 57   |
| 54 | R-20175 | Guard-53    | 6.9  | 2.08 | 3.32 | 1.77 | sticky | 3  | 8  | 10.3 | 81.6 | 74.5 | 62.3 |



|    |         |            |      |      |      |      |        |    |    |      |       |      |      |
|----|---------|------------|------|------|------|------|--------|----|----|------|-------|------|------|
|    |         | (check)    |      |      |      |      |        |    |    |      |       |      |      |
| 55 | R-20179 | Tara-2002  | 7.19 | 2.08 | 3.46 | 1.74 | sticky | 2  | 5  | 11.6 | 82.3  | 77.3 | 52.3 |
| 56 | R-20180 | Tara-1730  | 6.7  | 2.2  | 3.04 | 1.84 | sticky | 4  | 6  | 10.2 | 79.4  | 74.6 | 56.8 |
| 57 | R-20181 | Safa-F1    | 6.32 | 2.04 | 3.09 | 1.8  | sticky | 4  | 7  | 10.6 | 84    | 75.3 | 74   |
| 58 | R-20183 | LPSA-06    | 6.86 | 1.79 | 3.83 | 1.63 | sticky | 12 | 7  | 9.8  | 80    | 74.6 | 54.7 |
| 59 | R-20185 | 16001      | 6.06 | 2.03 | 2.98 | 1.64 | sticky | 5  | 11 | 8.3  | 82.5  | 76.5 | 69.4 |
| 60 | R-2019  | Yg-20      | 6.55 | 1.92 | 3.41 | 1.72 | sticky | 6  | 14 | 9.9  | 83.8  | 75.4 | 51.4 |
| 61 | R-20190 | PAPA-HR-02 | 6.72 | 1.86 | 3.61 | 1.74 | sticky | 3  | 7  | 10.4 | 84.6  | 74.4 | 56.7 |
| 62 | R-20191 | LPSA-09    | 6.48 | 1.96 | 3.31 | 1.7  | sticky | 12 | 16 | 10   | 81.5  | 72.6 | 52   |
| 63 | R-20193 | Murk-101   | 6.54 | 1.98 | 3.3  | 1.65 | sticky | 4  | 5  | 9.2  | 76.14 | 73.6 | 54.4 |
| 64 | R-20195 | Prince-433 | 6.87 | 2.06 | 3.33 | 1.78 | sticky | 2  | 8  | 10.5 | 80.6  | 76.3 | 57.4 |
| 65 | R-20197 | Arisco-91  | 6.82 | 1.96 | 3.48 | 1.84 | sticky | 3  | 5  | 10.4 | 82    | 78.6 | 60.5 |
| 66 | R-20199 | ASW-503    | 6.79 | 2.03 | 3.34 | 1.8  | sticky | 6  | 7  | 9.9  | 83    | 79   | 64   |
| 67 | R-2020  | CD-32      | 6.62 | 2    | 3.31 | 1.7  | sticky | 3  | 6  | 9.9  | 77.2  | 71   | 56.8 |
| 68 | R-2022  | HSP-22     | 7.21 | 1.93 | 3.73 | 1.7  | sticky | 10 | 9  | 11.8 | 76    | 71   | 55.2 |
| 69 | R-2024  | HP-1       | 7.01 | 2.04 | 3.44 | 1.82 | sticky | 2  | 6  | 10.2 | 81    | 77.3 | 53.8 |
| 70 | R-2026  | LS-115     | 6.92 | 2.06 | 3.36 | 1.82 | sticky | 4  | 15 | 9.8  | 81.2  | 76.3 | 61.8 |
| 71 | R-2027  | TEG-786    | 7.08 | 2.03 | 3.49 | 1.78 | sticky | 3  | 2  | 11   | 80.7  | 77.6 | 61   |
| 72 | R-2029  | KF-911     | 6.29 | 1.92 | 3.28 | 1.57 | sticky | 4  | 16 | 10   | 80.6  | 74.3 | 50.6 |
| 73 | R-2030  | PAPA-HR-01 | 6.81 | 2.04 | 3.34 | 1.81 | sticky | 4  | 13 | 11.2 | 80.5  | 75.4 | 56.7 |
| 74 | R-2048  | 13076      | 7.11 | 1.76 | 4.04 | 1.65 | sticky | 3  | 6  | 10.6 | 78    | 68.2 | 51.4 |

|    |        |                        |      |      |      |      |        |    |    |      |      |      |      |
|----|--------|------------------------|------|------|------|------|--------|----|----|------|------|------|------|
| 75 | R-2050 | FMC-4                  | 6.86 | 2.09 | 3.28 | 1.79 | sticky | 7  | 13 | 11.3 | 81.6 | 74.4 | 53.7 |
| 76 | R-2053 | FB-3086                | 6.54 | 1.9  | 3.44 | 1.64 | sticky | 20 | 19 | 8.9  | 81.2 | 74.5 | 52.2 |
| 77 | R-2055 | Kisan-07               | 6.59 | 1.96 | 3.36 | 1.76 | sticky | 3  | 6  | 11.3 | 77   | 68   | 51   |
| 78 | R-2057 | CNRRI-17-19            | 6.47 | 1.85 | 3.49 | 1.64 | sticky | 17 | 11 | 9.6  | 80.3 | 73.7 | 53.3 |
| 79 | R-2059 | Sunrise Super          | 6.97 | 1.94 | 3.59 | 1.64 | sticky | 8  | 12 | 9.6  | 81.2 | 73.3 | 53.8 |
| 80 | R-2061 | Naubahar<br>Super Gold | 6.77 | 2    | 3.38 | 1.67 | sticky | 4  | 9  | 9.9  | 82   | 74.6 | 56.8 |
| 81 | R-2063 | EG-1907                | 7.13 | 2.09 | 3.41 | 1.71 | sticky | 6  | 7  | 10   | 81.2 | 76.4 | 54.4 |
| 82 | R-2065 | FB-1802                | 6.4  | 1.9  | 3.37 | 1.66 | sticky | 5  | 9  | 9.6  | 78   | 73.9 | 53.4 |
| 83 | R-2067 | Naubahar<br>IQS-749    | 7.06 | 2.05 | 3.44 | 1.74 | sticky | 4  | 12 | 11.3 | 80.5 | 72.6 | 60.2 |
| 84 | R-2069 | EG-1904                | 6.86 | 2.09 | 3.28 | 1.72 | sticky | 4  | 12 | 9.8  | 78.8 | 71.8 | 52.6 |
| 85 | R-2070 | CNRRI-17-08            | 6.39 | 2.02 | 3.16 | 1.63 | sticky | 4  | 16 | 10.2 | 77   | 69.5 | 53.5 |
| 86 | R-2071 | FB-53                  | 6.58 | 2.01 | 2.27 | 1.75 | sticky | 5  | 17 | 9.4  | 80.1 | 71.6 | 52   |
| 87 | R-2073 | Rachna-414             | 6.95 | 2.15 | 3.23 | 1.79 | sticky | 4  | 16 | 10   | 79.9 | 75.4 | 52.6 |
| 88 | R-2075 | SC-156                 | 7.11 | 1.96 | 3.62 | 1.74 | sticky | 3  | 15 | 10   | 78.7 | 70   | 50.4 |
| 89 | R-2077 | Naubahar-786           | 6.94 | 2.02 | 3.43 | 1.76 | sticky | 6  | 14 | 11   | 76.4 | 70.2 | 51   |
| 90 | R-2079 | EG-1906                | 6.68 | 1.97 | 3.39 | 1.67 | sticky | 5  | 7  | 10.3 | 78.6 | 75.4 | 60.3 |
| 91 | R-2081 | SC-130                 | 6.99 | 2.03 | 3.44 | 1.78 | sticky | 3  | 6  | 11   | 79.6 | 74.3 | 54.7 |
| 92 | R-2083 | FB-1902                | 6.53 | 2.11 | 3.09 | 1.5  | sticky | 6  | 14 | 10.1 | 78.2 | 72   | 67   |
| 93 | R-2085 | CNRRI-17-11            | 6.62 | 1.98 | 3.34 | 1.71 | sticky | 3  | 6  | 9.8  | 78   | 73.3 | 55   |
| 94 | R-2088 | BKT-275                | 6.44 | 1.94 | 3.32 | 1.65 | sticky | 7  | 15 | 9.4  | 79.8 | 71   | 52.4 |

|     |         |                |      |      |      |      |        |    |    |      |      |      |      |
|-----|---------|----------------|------|------|------|------|--------|----|----|------|------|------|------|
| 95  | R-2090  | EG-1901        | 6.6  | 2.13 | 3.1  | 1.77 | sticky | 2  | 7  | 10   | 79.3 | 72   | 58.8 |
| 96  | R-2091  | SC-170         | 6.48 | 1.98 | 3.31 | 1.69 | sticky | 4  | 11 | 9.2  | 79.7 | 73   | 58.8 |
| 97  | R-2093  | CR-509         | 6.74 | 2.04 | 3.3  | 1.76 | sticky | 4  | 9  | 10.2 | 81.4 | 74.8 | 50.8 |
| 98  | R-2095  | CNRRI-17-18    | 6.4  | 1.88 | 3.4  | 1.64 | sticky | 10 | 10 | 9.5  | 80.6 | 76.9 | 61.4 |
| 99  | R-2097  | Sunrise Wonder | 6.57 | 1.98 | 3.32 | 1.68 | sticky | 2  | 3  | 9.2  | 82.5 | 75.2 | 63.4 |
| 100 | R-2099  | Millet Rice    | 6.92 | 2.08 | 3.33 | 1.81 | sticky | 5  | 16 | 10.4 | 81   | 71.8 | 59   |
| 101 | R-20691 | CKD-3185       | 6.54 | 2.04 | 3.2  | 1.65 | sticky | 3  | 4  | 9.8  | 78.6 | 74.8 | 55.6 |
| 102 | R 20263 | CKD-3188       | -    | -    | -    | -    | -      | -  | -  | -    | -    | -    | -    |
| 103 | R 20265 | CKD-3274       | -    | -    | -    | -    | -      | -  | -  | -    | -    | -    | -    |
| 104 | R 20267 | CKD-3275       | -    | -    | -    | -    | -      | -  | -  | -    | -    | -    | -    |

- No data was received

TMR = Total milled rice, HR = Head rice, CGL = Cooked Grain Length; B= Bursting upon cooking, E/R= elongation ratio;

**Supplementary Table S2 (Part-i): Mean of Paddy Yield (kg/ha) of Rice Hybrids Evaluated in NUYT during Kharif, 2021**

| S.# | Entry Name | Decode Name         | GUARD, Gullarchi | Suns Crop, DG Khan | FMTC, Shikarpur | EMKAY, Farooq abad | ARI, DI Khan | Dokri, Larkana | RRI, KSK | SRRI, Thatha | Tara Crops, | PARC, KSK | Average yield (kg/ha) |
|-----|------------|---------------------|------------------|--------------------|-----------------|--------------------|--------------|----------------|----------|--------------|-------------|-----------|-----------------------|
| 1   | R-21001    | E-2103              | 11188            | 6040               | 10498           | 7877               | 6000         | 8188           | 5311     | 9800         | 7659        | 4888      | 7745                  |
| 2   | R-21003    | Premium-1           | 10542            | 9100               | 7365            | 8197               | 7333         | 7820           | 5333     | 8900         | 9329        | 4859      | 7878                  |
| 3   | R-21005    | Ultra-1             | 11963            | 6860               | 6781            | 8487               | 8667         | 7486           | 5104     | 9000         | 9318        | 4755      | 7842                  |
| 4   | R-21007    | SG-2101             | 10207            | 6983               | 7990            | 8293               | 5333         | 8432           | 5283     | 9200         | 8599        | 5354      | 7567                  |
| 5   | R-21009    | Dhanak(FM-HRS-2101) | 10956            | 7941               | 10007           | 7927               | 7333         | 8561           | 4545     | 9150         | 8432        | 4138      | 7899                  |
| 6   | R-21010    | Dagha-5503          | 9979             | 10257              | 8929            | 8187               | 7333         | 7723           | 5688     | 9650         | 8324        | 4365      | 8043                  |
| 7   | R-21011    | HSP-22              | 5637             | 8833               | 7089            | 7703               | 8000         | 7763           | 5612     | 8100         | 9742        | 4828      | 7331                  |
| 8   | R-21013    | KF-801              | 11932            | 7685               | 6753            | 8107               | 5333         | 7710           | 5626     | 7950         | 10060       | 5871      | 7703                  |
| 9   | R-21015    | Winner-99           | 8607             | 8360               | 9251            | 9290               | 4000         | 7536           | 5688     | 8800         | 8639        | 5351      | 7552                  |
| 10  | R-21017    | HS-110              | 10309            | 9187               | 11555           | 8057               | 4667         | 8638           | 5441     | 9400         | 9260        | 4670      | 8118                  |
| 11  | R-21019    | HSP-19              | 9297             | 7680               | 8941            | 8857               | 6000         | 8025           | 4802     | 7950         | 9968        | 4364      | 7588                  |
| 12  | R-21020    | S-47                | 7305             | 9980               | 8667            | 8213               | 2000         | 8438           | 4872     | 9150         | 8704        | 3881      | 7121                  |
| 13  | R-21022    | Plus-1              | 10154            | 9233               | 11471           | 9133               | 12000        | 8028           | 4769     | 9500         | 10388       | 4072      | 8875                  |
| 14  | R-21024    | HS-100              | 8092             | 10139              | 11754           | 9143               | 5333         | 9847           | 6109     | 8700         | 10487       | 4702      | 8431                  |
| 15  | R-21026    | MG-101              | 10532            | 8929               | 8114            | 8117               | 6667         | 8638           | 4119     | 9350         | 10388       | 4820      | 7967                  |
| 16  | R-21027    | HSP-20              | 8884             | 9012               | 6201            | 8150               | 3333         | 8467           | 5455     | 9200         | 11369       | 4931      | 7500                  |
| 17  | R-21029    | PAPA HR01           | 10452            | 9987               | 9882            | 7277               | 4667         | 7574           | 6377     | 8950         | 12016       | 5050      | 8223                  |
| 18  | R-21030    | FL-2051             | 9586             | 8787               | 6771            | 8267               | 6667         | 7282           | 6049     | 9250         | 9902        | 4282      | 7684                  |
| 19  | R-21033    | E-2102              | 7025             | 8933               | 9051            | 8393               | 4000         | 8738           | 5096     | 8900         | 9802        | 4306      | 7424                  |
| 20  | R-21035    | SG-2103             | 10400            | 10040              | 9312            | 8827               | 5333         | 8286           | 5284     | 8700         | 10122       | 4110      | 8041                  |
| 21  | R-21037    | White Gold-1        | 10188            | 11773              | 7494            | 8630               | 5333         | 8635           | 5190     | 8200         | 9256        | 3400      | 7810                  |
| 22  | R-21039    | TXP-RC-786          | 9683             | 8403               | 8825            | 9393               | 5333         | 8536           | 5585     | 10001        | 10156       | 4088      | 8000                  |
| 23  | R-21040    | S-98                | 9554             | 9080               | 8366            | 7583               | 4667         | 7632           | 6645     | 7900         | 11039       | 4161      | 7663                  |

|    |         |                |       |       |       |      |      |      |      |       |       |      |      |
|----|---------|----------------|-------|-------|-------|------|------|------|------|-------|-------|------|------|
| 24 | R-21041 | KF-1398        | 7748  | 8027  | 11009 | 8260 | 6000 | 8982 | 4896 | 9200  | 9099  | 3789 | 7701 |
| 25 | R-21043 | Dagha-5504     | 10497 | 7747  | 7741  | 7937 | 6667 | 8687 | 6210 | 8750  | 9517  | 4377 | 7813 |
| 26 | R-21044 | HSP-21         | 8558  | 9967  | 10287 | 7940 | 8000 | 8466 | 5504 | 9600  | 10771 | 4525 | 8362 |
| 27 | R-21046 | E-2101         | 9234  | 9728  | 9424  | 7950 | 6000 | 7843 | 7725 | 9150  | 11000 | 4876 | 8293 |
| 28 | R-21048 | SG-2102        | 9524  | 12947 | 8365  | 8373 | 6000 | 7938 | 6845 | 10250 | 10507 | 4227 | 8498 |
| 29 | R-21050 | KF-911         | 8191  | 9507  | 10518 | 7690 | 2667 | 8874 | 5878 | 9000  | 10962 | 4626 | 7791 |
| 30 | R-21053 | Winner-86      | 10312 | 8800  | 10212 | 8447 | 4000 | 7130 | 7252 | 8100  | 8618  | 4626 | 7750 |
| 31 | R-21055 | HSP-18         | 8874  | 11480 | 10068 | 6293 | 6667 | 8638 | 5632 | 8950  | 11268 | 4188 | 8206 |
| 32 | R-21057 | FL-2050        | 10954 | 8720  | 8305  | 7493 | 8000 | 8255 | 5967 | 7900  | 10201 | 5077 | 8087 |
| 33 | R-21059 | Papa-HR02      | 8105  | 6800  | 6639  | 8377 | 4000 | 7738 | 6586 | 9000  | 11127 | 5153 | 7352 |
| 34 | R-21061 | VT-22          | 10551 | 8267  | 7530  | 8260 | 6000 | 8837 | 6301 | 9250  | 9329  | 4946 | 7927 |
| 35 | R-21063 | S-78           | 10313 | 7840  | 8805  | 8463 | 7333 | 8468 | 6438 | 8900  | 8560  | 4548 | 7967 |
| 36 | R-21065 | Kissan-222     | 11014 | 8487  | 5427  | 8137 | 7333 | 7521 | 5646 | 10100 | 9739  | 5038 | 7844 |
| 37 | R-21067 | Raaj-313       | 10114 | 7440  | 6470  | 7947 | 2667 | 7956 | 6973 | 8750  | 7091  | 4175 | 6958 |
| 38 | R-21069 | HDR-16         | 10022 | 8613  | 7112  | 8630 | 8000 | 7645 | 5582 | 9600  | 10448 | 4801 | 8045 |
| 39 | R-21070 | IS-476         | 9937  | 10773 | 8909  | 9023 | 5333 | 7600 | 6469 | 9350  | 9696  | 4445 | 8153 |
| 40 | R-21071 | Muhafiz-555    | 9983  | 9293  | 9901  | 8147 | 5333 | 7854 | 6473 | 8980  | 9362  | 3664 | 7899 |
| 41 | R-21073 | EG-1906        | 9930  | 8819  | 8796  | 8927 | 6000 | 8536 | 5103 | 1080  | 8658  | 4995 | 7084 |
| 42 | R-21075 | LPSA-09        | 9947  | 9500  | 6296  | 8700 | 8667 | 8134 | 6368 | 9550  | 8756  | 4477 | 8040 |
| 43 | R-21077 | Tara-2002      | 10278 | 9307  | 6238  | 8937 | 3333 | 9564 | 5429 | 8600  | 9728  | 3832 | 7525 |
| 44 | R-21079 | XLCS-1813      | 8706  | 4853  | 6992  | 8193 | 4667 | 7138 | 5083 | 9450  | 7792  | 4371 | 6724 |
| 45 | R-21081 | GNY-53 (Check) | 9814  | 7227  | 7902  | 8067 | 5333 | 7423 | 5250 | 8750  | 8491  | 5150 | 7341 |
| 46 | R-21083 | EG-1908        | 10720 | 8133  | 7192  | 8423 | 6000 | 8415 | 5677 | 9600  | 7589  | 4458 | 7621 |
| 47 | R-21085 | Tara-2111      | 10445 | 6773  | 6851  | 8630 | 5333 | 8887 | 4945 | 8950  | 8412  | 4589 | 7382 |
| 48 | R-21088 | TEG-111        | 9100  | 8053  | 9817  | 8113 | 6000 | 8356 | 4677 | 9300  | 7527  | 5274 | 7622 |
| 49 | R-21090 | LPSA-01        | 9828  | 5723  | 10175 | 8927 | 6667 | 7395 | 5609 | 8900  | 8021  | 4778 | 7602 |
| 50 | R-21091 | Noor-444       | 10295 | 6707  | 7455  | 9070 | 4000 | 8536 | 4668 | 9050  | 8726  | 4003 | 7251 |
| 51 | R-21093 | Raaj-555       | 10323 | 6173  | 6522  | 9413 | 5333 | 8647 | 5413 | 9300  | 8422  | 3980 | 7353 |

|    |         |                 |       |       |       |      |       |      |      |       |       |      |      |
|----|---------|-----------------|-------|-------|-------|------|-------|------|------|-------|-------|------|------|
| 52 | R-21095 | GS-1199         | 10733 | 7693  | 7170  | 8077 | 4667  | 8786 | 5274 | 9100  | 7677  | 6229 | 7541 |
| 53 | R-21097 | Rawayat-245     | 10226 | 7267  | 6573  | 7617 | 4000  | 8175 | 5238 | 9650  | 8511  | 4778 | 7203 |
| 54 | R-21099 | IS-696          | 9350  | 7087  | 7685  | 8903 | 5333  | 8321 | 4374 | 9350  | 9448  | 3543 | 7339 |
| 55 | R-21100 | EG-1907         | 10968 | 6685  | 10184 | 8307 | 5333  | 8028 | 4813 | 7980  | 8746  | 5454 | 7650 |
| 56 | R-21101 | MAITA-125       | 10399 | 6764  | 8205  | 8060 | 6000  | 8132 | 5550 | 10150 | 8494  | 5674 | 7743 |
| 57 | R-21103 | Tara-2112       | 10802 | 7907  | 15904 | 8237 | 5333  | 8651 | 5239 | 9300  | 8628  | 4979 | 8498 |
| 58 | R-21105 | KS-2153         | 9737  | 6155  | 8526  | 8677 | 6667  | 8647 | 4737 | 10300 | 10354 | 4188 | 7799 |
| 59 | R-21107 | EG-1901         | 9503  | 6965  | 5086  | 8803 | 5333  | 8231 | 5939 | 9350  | 9502  | 5235 | 7395 |
| 60 | R-21109 | Kissan-363      | 10847 | 8343  | 8266  | 7607 | 5333  | 8675 | 4572 | 8800  | 10424 | 4137 | 7701 |
| 61 | R-21111 | LPSA-08         | 10987 | 5763  | 10105 | 7237 | 2000  | 8739 | 5735 | 9800  | 10189 | 4251 | 7481 |
| 62 | R-21113 | CD-910          | 10220 | 9299  | 5785  | 8253 | 10000 | 8536 | 4296 | 8100  | 9081  | 4569 | 7814 |
| 63 | R-21115 | Noor-111        | 8770  | 8676  | 6799  | 7690 | 6667  | 8612 | 5767 | 9800  | 10796 | 4794 | 7837 |
| 64 | R-21117 | GS-1122         | 9123  | 8013  | 7776  | 7213 | 7333  | 7825 | 6587 | 10200 | 9801  | 4404 | 7828 |
| 65 | R-21119 | Grace-2         | 10987 | 7480  | 6602  | 7310 | 4000  | 8028 | 6084 | 10100 | 7174  | 5600 | 7337 |
| 66 | R-21120 | EG-1904         | 10797 | 7747  | 7080  | 7727 | 8000  | 8124 | 6643 | 8550  | 7638  | 4271 | 7658 |
| 67 | R-21121 | Tara-2001       | 9873  | 5867  | 7765  | 7610 | 6000  | 6933 | 5405 | 9400  | 9271  | 3447 | 7157 |
| 68 | R-21122 | KS-2151         | 11078 | 6213  | 6536  | 7723 | 5333  | 8134 | 5651 | 8600  | 8833  | 4654 | 7276 |
| 69 | R-21123 | XLCS-3463       | 9075  | 7040  | 7604  | 8047 | 4667  | 7986 | 5828 | 8100  | 8596  | 3836 | 7078 |
| 70 | R-21125 | GIR-1803        | 10145 | 6013  | 8847  | 8177 | 5333  | 8023 | 5775 | 9500  | 8481  | 4474 | 7477 |
| 71 | R-21127 | LPSA-06         | 10374 | 5667  | 8696  | 8400 | 6000  | 8357 | 5301 | 8950  | 7545  | 4057 | 7335 |
| 72 | R-21129 | Ababeel-785     | 9263  | 10107 | 7880  | 8737 | 8000  | 8377 | 5459 | 8600  | 8403  | 5237 | 8006 |
| 73 | R-21131 | LPSA-02         | 11190 | 8848  | 21002 | 8007 | 4667  | 8637 | 4519 | 10200 | 8491  | 5829 | 9139 |
| 74 | R-21133 | Bakhtawar-275   | 8605  | 10027 | 7004  | 8077 | 6000  | 8113 | 4868 | 8700  | 7580  | 4745 | 7372 |
| 75 | R-21135 | Shabnam-786     | 10608 | 7120  | 7202  | 8543 | 5333  | 8056 | 5057 | 9600  | 8658  | 4619 | 7480 |
| 76 | R-21138 | Sina-500        | 6597  | 9467  | 8982  | 7767 | 9333  | 8911 | 6270 | 8550  | 7712  | 3460 | 7705 |
| 77 | R-21140 | Nawbahar Gold-2 | 10894 | 5820  | 8398  | 8520 | 6667  | 8355 | 6991 | 8950  | 8520  | 4011 | 7713 |
| 78 | R-21141 | LUS-250         | 11580 | 9968  | 8618  | 7090 | 4000  | 8746 | 4629 | 10300 | 8805  | 4704 | 7844 |
| 79 | R-21143 | Kissan-07       | 9596  | 8417  | 8550  | 7233 | 4667  | 8341 | 5768 | 9150  | 8941  | 4658 | 7532 |

|     |         |                     |       |       |       |      |       |      |      |       |       |      |      |
|-----|---------|---------------------|-------|-------|-------|------|-------|------|------|-------|-------|------|------|
| 80  | R-21145 | TEG-786             | 11520 | 9075  | 6302  | 7817 | 4667  | 7675 | 5014 | 9400  | 9329  | 4819 | 7562 |
| 81  | R-21147 | SC-138              | 10002 | 7123  | 9625  | 8090 | 5333  | 8193 | 5085 | 8750  | 8756  | 5147 | 7610 |
| 82  | R-21149 | Riscer              | 9702  | 7485  | 6824  | 7957 | 4000  | 8152 | 5926 | 9200  | 9782  | 4734 | 7376 |
| 83  | R-21150 | Diamond-121 (Check) | 9904  | 7661  | 8441  | 8347 | 4667  | 8054 | 5282 | 9700  | 8903  | 4220 | 7518 |
| 84  | R-21151 | HP-1                | 8627  | 7715  | 9593  | 8080 | 6000  | 8097 | 5888 | 10600 | 9653  | 4382 | 7863 |
| 85  | R-21153 | DM-999              | 10317 | 9993  | 8517  | 6577 | 6667  | 8023 | 4988 | 9300  | 9825  | 5370 | 7958 |
| 86  | R-21155 | Nawbahar gold-1     | 6677  | 7965  | 5770  | 8487 | 4000  | 8430 | 4770 | 8900  | 6793  | 5381 | 6717 |
| 87  | R-21157 | Nawbahar-2102       | 10070 | 10565 | 7431  | 7433 | 6667  | 8421 | 5486 | 10400 | 8795  | 4848 | 8012 |
| 88  | R-21159 | Bakhtawar-281       | 10522 | 7819  | 9429  | 8360 | 4000  | 8656 | 4327 | 9600  | 8814  | 4818 | 7635 |
| 89  | R-21161 | Badbaan-06          | 7944  | 8480  | 8098  | 8153 | 6667  | 8873 | 4582 | 8900  | 7907  | 5072 | 7467 |
| 90  | R-21165 | ASW-503             | 10886 | 7820  | 10587 | 7347 | 1333  | 8130 | 4652 | 9400  | 8599  | 4726 | 7348 |
| 91  | R-21170 | JJR-51              | 9131  | 10800 | 7268  | 7617 | 5333  | 8127 | 4349 | 9800  | 8334  | 3629 | 7439 |
| 92  | R-21173 | SC-170              | 10388 | 10673 | 7557  | 8043 | 5333  | 7932 | 5555 | 10400 | 8609  | 5190 | 7968 |
| 93  | R-21175 | Sina-250            | 10938 | 8075  | 9580  | 6650 | 4000  | 8327 | 5089 | 9550  | 10307 | 4704 | 7722 |
| 94  | R-21179 | FMC-4               | 9639  | 10741 | 7914  | 7697 | 4667  | 8352 | 4996 | 8650  | 8716  | 3238 | 7461 |
| 95  | R-21180 | Nawbahar-2101       | 10238 | 9320  | 8429  | 7970 | 6667  | 8857 | 5255 | 10300 | 9491  | 4219 | 8075 |
| 96  | R-21181 | AS-525              | 10178 | 7400  | 7957  | 7880 | 6000  | 8347 | 4917 | 9700  | 9469  | 4364 | 7621 |
| 97  | R-21183 | LS-115              | 10067 | 5824  | 9063  | 7987 | 10667 | 7554 | 5433 | 10550 | 8756  | 4905 | 8080 |
| 98  | R-21185 | Sundar-786          | 11141 | 6891  | 8854  | 8277 | 3333  | 8054 | 4904 | 9700  | 8687  | 5018 | 7486 |
| 99  | R-21187 | SG-415              | 9643  | 8600  | 7494  | 8257 | 5333  | 8630 | 5115 | 8900  | 10911 | 4455 | 7734 |
| 100 | R-21189 | Badbaan-07          | 9923  | 8320  | 7477  | 7717 | 1333  | 8313 | 4064 | 8950  | 8589  | 5014 | 6970 |
| 101 | R-21190 | SG-436              | 11021 | 10707 | 8106  | 8413 | 6667  | 8255 | 4578 | 8400  | 10130 | 4056 | 8033 |
| 102 | R-21191 | JJR-88              | 9518  | 7453  | 10729 | 7780 | 6000  | 7923 | 5429 | 10200 | 8550  | 2746 | 7633 |
| 103 | R-21193 | ASW-505             | 10831 | 7101  | 8873  | 9077 | 5333  | 8047 | 5411 | 9750  | 9883  | 4765 | 7907 |
| 104 | R-21194 | DM-111              | 10056 | 6932  | 7834  | 8340 | 6000  | 8055 | 5298 | 8800  | 10260 | 4275 | 7585 |
| 105 | R-21195 | FMC-3               | 9572  | 10860 | 5754  | 9093 | 5333  | 8751 | 5680 | 7900  | 11038 | 4224 | 7821 |
| 106 | R-21197 | US-125              | 11668 | 7107  | 7142  | 8667 | 6000  | 7857 | 5910 | 9300  | 10201 | 4107 | 7796 |
| 107 | R-21199 | SC-156              | 9988  | 7923  | 7658  | 7863 | 4000  | 8656 | 5822 | 8900  | 11102 | 3929 | 7584 |

|     |         |              |       |       |      |      |      |      |      |       |       |      |      |
|-----|---------|--------------|-------|-------|------|------|------|------|------|-------|-------|------|------|
| 108 | R-21200 | Prime-433    | 10711 | 7273  | 9773 | 8260 | 2000 | 8145 | 5398 | 7900  | 10643 | 5193 | 7530 |
| 109 | R-21201 | IS-81        | 8682  | 7500  | 9233 | 7780 | 3333 | 8332 | 5548 | 9600  | 9730  | 3644 | 7338 |
| 110 | R-21203 | Sitra-404    | 10622 | 7368  | 9703 | 7803 | 7333 | 8733 | 5868 | 8900  | 8167  | 4665 | 7916 |
| 111 | R-21205 | FB-103       | 9967  | 7000  | 9256 | 7740 | 4667 | 8011 | 5780 | 9100  | 9613  | 4877 | 7601 |
| 112 | R-21207 | HP-2         | 10645 | 8017  | 6777 | 8327 | 2667 | 7545 | 5563 | 10200 | 8177  | 4962 | 7288 |
| 113 | R-21209 | Rachana-515  | 10664 | 10160 | 7244 | 7987 | 5333 | 8457 | 5620 | 7900  | 10414 | 4222 | 7800 |
| 114 | R-21211 | MS-333       | 8754  | 6783  | 9341 | 7517 | 4000 | 7522 | 5470 | 8800  | 10146 | 4848 | 7318 |
| 115 | R-21212 | Mumtaaz-1473 | 9792  | 5920  | 6478 | 7970 | 4000 | 7690 | 6127 | 7108  | 8725  | 4941 | 6875 |
| 116 | R-21213 | Anza         | 9021  | 6525  | 7473 | 7443 | 6667 | 8363 | 5660 | 9900  | 9013  | 4275 | 7434 |
| 117 | R-21215 | FB-1402      | 9873  | 6901  | 8392 | 8867 | 1333 | 7899 | 5417 | 9600  | 7177  | 4864 | 7032 |
| 118 | R-21217 | Uqab-101     | 10918 | 7644  | 7823 | 8710 | 6667 | 7630 | 5936 | 10500 | 8607  | 3767 | 7820 |
| 119 | R-21219 | Bankuit-128  | 10097 | 6127  | 8338 | 8440 | 4000 | 8655 | 5604 | 7800  | 8380  | 4821 | 7226 |
| 120 | R-21220 | PT-918       | 8233  | 7445  | 8545 | 8543 | 4667 | 8301 | 5598 | 8900  | 8218  | 4135 | 7259 |
| 121 | R-21222 | CMS-404      | 9728  | 7573  | 8708 | 8170 | 4667 | 6042 | 4259 | 9125  | 8736  | 4007 | 7101 |
| 122 | R-21225 | ME-444       | 9540  | 8627  | 8205 | 8030 | 8000 | 8055 | 5433 | 9745  | 7932  | 3991 | 7756 |
| 123 | R-21227 | PT-930       | 10023 | 6792  | 8244 | 8123 | 6000 | 8323 | 5034 | 7186  | 6071  | 4296 | 7009 |
| 124 | R-21229 | FB-1802      | 9889  | 5907  | 6252 | 8680 | 5333 | 8754 | 4626 | 9216  | 10146 | 4072 | 7288 |
| 125 | R-21230 | FB-101       | 8302  | 5781  | 6282 | 8547 | 6000 | 8433 | 5872 | 8629  | 9613  | 3931 | 7139 |
| 126 | R-21232 | Super Sultan | 9983  | 7209  | 8838 | 8433 | 5333 | 7956 | 4545 | 7162  | 8109  | 4212 | 7178 |
| 127 | R-21233 | HP-3         | 9461  | 6912  | 7195 | 8090 | 4000 | 8565 | 5084 | 10789 | 9224  | 4546 | 7387 |
| 128 | R-21235 | Rachana-414  | 8748  | 6993  | 8883 | 8313 | 7333 | 8655 | 5604 | 8245  | 10197 | 5178 | 7815 |
| 129 | R-21237 | Bankuit-125  | 9011  | 4632  | 7008 | 8270 | 6000 | 8398 | 5094 | 9126  | 7550  | 5059 | 7015 |
| 130 | R-21239 | MWK          | 10382 | 8587  | 8143 | 7790 | 5333 | 8040 | 4517 | 9132  | 8520  | 3919 | 7436 |
| 131 | R-21240 | Tass         | 8591  | 7115  | 4130 | 7627 | 3333 | 8873 | 5067 | 9122  | 6393  | 5176 | 6543 |
| 132 | R-21241 | 1122         | 8554  | 7120  | 8599 | 8210 | 3333 | 8713 | 4443 | 9809  | 8617  | 4292 | 7169 |
| 133 | R-21242 | YG-21        | 9256  | 6061  | 9357 | 8263 | 6667 | 8746 | 3947 | 9128  | 7971  | 4163 | 7356 |
| 134 | R-21244 | Manira-786   | 6141  | 7900  | 6312 | 7953 | 3333 | 8737 | 5343 | 9628  | 7952  | 4510 | 6781 |
| 135 | R-21245 | Arisco-88    | 9153  | 9315  | 8431 | 7730 | 3333 | 8147 | 4949 | 9172  | 8768  | 4698 | 7370 |



|                   |                |              |                |                |                |                |                |                |                |                |                |                |             |
|-------------------|----------------|--------------|----------------|----------------|----------------|----------------|----------------|----------------|----------------|----------------|----------------|----------------|-------------|
| <b>136</b>        | <b>R-21247</b> | Bankhuit-130 | 9103           | 9463           | 7855           | 8770           | 1333           | 8127           | 4843           | 8156           | 6346           | 5021           | <b>6902</b> |
| <b>137</b>        | <b>R-21249</b> | Tezro-121A   | 9332           | 10973          | 11114          | 8260           | 1333           | 8452           | 4820           | 9126           | 6838           | 5525           | <b>7577</b> |
| <b>Grand Mean</b> |                |              | <b>9794.61</b> | <b>8076.63</b> | <b>8308.65</b> | <b>8153.53</b> | <b>5446.04</b> | <b>8224.35</b> | <b>5419.18</b> | <b>9085.80</b> | <b>9103.06</b> | <b>4549.36</b> | <b>7616</b> |
| <b>CV %</b>       |                |              | <b>0.97</b>    | <b>1.62</b>    | <b>1.95</b>    | <b>0.57</b>    | <b>2.88</b>    | <b>0.52</b>    | <b>1.07</b>    | <b>0.94</b>    | <b>1.07</b>    | <b>2.13</b>    |             |
| <b>LSD (0.05)</b> |                |              | <b>234.21</b>  | <b>1356.32</b> | <b>1465.11</b> | <b>1054.16</b> | <b>287.44</b>  | <b>1132.43</b> | <b>1674.65</b> | <b>255.14</b>  | <b>243.34</b>  | <b>1154.22</b> |             |

**Supplementary Table S2 (Part-Ii) Quality Characteristics of Rice Hybrids Evaluated in NUYT 2021**

|         |           |                      | Milling Recovery |              |           |                 |           |                 |                |                        | Grain Appearance |                |                   | Cooking Character       |            |             |              |
|---------|-----------|----------------------|------------------|--------------|-----------|-----------------|-----------|-----------------|----------------|------------------------|------------------|----------------|-------------------|-------------------------|------------|-------------|--------------|
| Sr. No. | Entry no. | Decode Name          | Paddy (gm)       | Moisture (%) | Husk (gm) | Brown Rice (gm) | Bran (gm) | White Rice (gm) | Head Rice (gm) | Head Rice Recovery (%) | W.R length (mm)  | W.R width (mm) | Length/width (mm) | Cooking Elongation (mm) | Stickiness | Curling (%) | Bursting (%) |
| 1       | R-21001   | E-2103               | 300              | 13.3         | 56.2      | 243.8           | 16.6      | 227.2           | 179.3          | 59.77                  | 7.29             | 2.04           | 3.57              | 12.4                    | sticki     | 2           | 7            |
| 2       | R-21003   | Premium-1            | 300              | 13.1         | 56.9      | 243.1           | 12.9      | 230.2           | 188.6          | 62.87                  | 7.02             | 2.03           | 3.46              | 11                      | sticki     | 2           | 11           |
| 3       | R-21005   | Ultra-1              | 300              | 13.9         | 78.2      | 221.8           | 18.3      | 203.5           | 179.4          | 59.80                  | 6.41             | 1.91           | 3.36              | 10.5                    | Sticki     | 3           | 7            |
| 4       | R-21007   | SG-2101              | 300              | 13.9         | 59        | 241             | 12.5      | 228.5           | 211            | 70.33                  | 6.47             | 2              | 3.24              | 10.3                    | sticki     | 2           | 2            |
| 5       | R-21009   | Dhanak(F M-HRS-2101) | 300              | 13.6         | 51.7      | 248.3           | 19.4      | 228.9           | 196            | 65.33                  | 7.42             | 2.12           | 3.50              | 11.5                    | sticki     | 5           | 5            |
| 6       | R-21010   | Dagha-5503           | 300              | 13.4         | 60.5      | 239.5           | 11        | 228.5           | 196            | 65.33                  | 6.79             | 1.91           | 3.55              | 9.6                     | Sticki     | 5           | 6            |
| 7       | R-21011   | HSP-22               | 300              | 13.2         | 59.1      | 240.9           | 21.5      | 219.4           | 158.1          | 52.70                  | 6.97             | 1.94           | 3.59              | 10.9                    | Sticki     | 11          | 13           |
| 8       | R-21013   | KF-801               | 300              | 13.6         | 51        | 249             | 24.1      | 224.9           | 163.7          | 54.57                  | 6.45             | 1.97           | 3.27              | 9.9                     | sticki     | 6           | 3            |
| 9       | R-21015   | Winner-99            | 300              | 12.5         | 49.8      | 250.2           | 22.2      | 228.0           | 175.6          | 58.53                  | 7.05             | 2.05           | 3.44              | 11.2                    | sticki     | 2           | 2            |
| 10      | R-21017   | HS-110               | 300              | 12.8         | 70.4      | 229.6           | 15.3      | 214.3           | 153            | 51.00                  | 7.01             | 1.99           | 3.52              | 10.5                    | Sticki     | 1           | 5            |
| 11      | R-21019   | HSP-19               | 300              | 13.1         | 57.6      | 242.4           | 21        | 221.4           | 175            | 58.33                  | 7.03             | 2.04           | 3.45              | 10.6                    | sticki     | 8           | 12           |
| 12      | R-21020   | S-47                 | 300              | 12.8         | 61.5      | 238.5           | 17.1      | 221.4           | 195.3          | 65.10                  | 6.45             | 1.85           | 3.49              | 9.7                     | Sticki     | 8           | 10           |
| 13      | R-21022   | Plus-1               | 300              | 13.6         | 56.2      | 243.8           | 12.3      | 231.5           | 152            | 50.67                  | 6.9              | 2.32           | 2.97              | 9.4                     | sticki     | 2           | 3            |
| 14      | R-21024   | HS-100               | 300              | 12.8         | 57.5      | 242.5           | 19.3      | 223.2           | 161.6          | 53.87                  | 6.6              | 1.99           | 3.32              | 10.2                    | sticki     | 2           | 2            |
| 15      | R-21026   | MG-101               | 300              | 12.6         | 56.4      | 243.6           | 13.3      | 230.3           | 170            | 56.67                  | 6.51             | 1.99           | 3.27              | 10.4                    | sticki     | 8           | 3            |
| 16      | R-21027   | HSP-20               | 300              | 13.5         | 50.8      | 249.2           | 17.3      | 231.9           | 214            | 71.33                  | 7.4              | 2.07           | 3.57              | 12.9                    | sticki     | 6           | 6            |
| 17      | R-21029   | PAPA HR01            | 300              | 13.1         | 51.9      | 248.1           | 14.5      | 233.6           | 159.6          | 53.20                  | 7.17             | 2.06           | 3.48              | 10.8                    | sticki     | 3           | 6            |
| 18      | R-21030   | FL-2051              | 300              | 12.8         | 54        | 246             | 17.2      | 228.8           | 162            | 54.00                  | 6.91             | 1.97           | 3.51              | 11.6                    | sticki     | 3           | 7            |

|    |         |              |     |      |      |       |      |        |       |       |      |      |      |      |        |    |    |
|----|---------|--------------|-----|------|------|-------|------|--------|-------|-------|------|------|------|------|--------|----|----|
| 19 | R-21033 | E-2102       | 300 | 12.9 | 53.8 | 246.2 | 13.2 | 233    | 160.9 | 53.63 | 6.56 | 2    | 3.28 | 10   | sticki | 8  | 7  |
| 20 | R-21035 | SG-2103      | 300 | 12.9 | 54.6 | 245.4 | 12.5 | 232.9  | 186.8 | 62.27 | 7.19 | 2.08 | 3.46 | 12.2 | sticki | 2  | 2  |
| 21 | R-21037 | White Gold-1 | 300 | 12   | 63.3 | 236.7 | 12.9 | 223.80 | 213.8 | 71.27 | 6.56 | 1.93 | 3.40 | 10.7 | sticki | 7  | 3  |
| 22 | R-21039 | TXP-RC-786   | 300 | 12.9 | 58.9 | 241.1 | 18.8 | 222.3  | 159   | 53.00 | 6.98 | 2.22 | 3.14 | 10.2 | sticki | 4  | 2  |
| 23 | R-21040 | S-98         | 300 | 13   | 58.4 | 241.6 | 17.6 | 224    | 209.6 | 69.87 | 6.68 | 1.92 | 3.48 | 10.5 | sticki | 11 | 9  |
| 24 | R-21041 | KF-1398      | 300 | 13.8 | 53.1 | 246.9 | 14.3 | 232.6  | 163   | 54.33 | 7.13 | 2.1  | 3.40 | 11.9 | sticki | 1  | 2  |
| 25 | R-21043 | Dagha-5504   | 300 | 12.9 | 60.1 | 239.9 | 15   | 224.9  | 212   | 70.67 | 6.51 | 1.93 | 3.37 | 9.9  | Sticki | 3  | 7  |
| 26 | R-21044 | HSP-21       | 300 | 13.2 | 54.3 | 245.7 | 16.2 | 229.5  | 174   | 58.00 | 7.28 | 1.87 | 3.89 | 13.2 | sticki | 24 | 12 |
| 27 | R-21046 | E-2101       | 300 | 14   | 50.4 | 249.6 | 20.3 | 229.3  | 175.1 | 58.37 | 7.1  | 1.89 | 3.76 | 11.2 | Sticki | 2  | 2  |
| 28 | R-21048 | SG-2102      | 300 | 13.3 | 55.2 | 244.8 | 19.3 | 225.5  | 166   | 55.33 | 7.11 | 2.13 | 3.34 | 11.8 | sticki | 5  | 6  |
| 29 | R-21050 | KF-911       | 300 | 12.6 | 55.5 | 244.5 | 12.3 | 232.2  | 182.1 | 60.70 | 7.16 | 2.08 | 3.44 | 9.3  | sticki | 1  | 2  |
| 30 | R-21053 | Winner-86    | 300 | 12.6 | 63.2 | 236.8 | 22   | 214.8  | 150.8 | 50.27 | 6.7  | 2.04 | 3.28 | 10.4 | sticki | 8  | 3  |
| 31 | R-21055 | HSP-18       | 300 | 13.2 | 61.4 | 238.6 | 15.1 | 223.5  | 149.8 | 49.93 | 6.52 | 2.03 | 3.21 | 10.8 | Sticki | 4  | 5  |
| 32 | R-21057 | FL-2050      | 300 | 12.8 | 53.7 | 246.3 | 11.9 | 234.4  | 191.8 | 63.93 | 6.6  | 1.85 | 3.57 | 9.5  | Sticki | 4  | 7  |
| 33 | R-21059 | Papa-HR02    | 300 | 13.5 | 54   | 246   | 28.4 | 217.60 | 161.9 | 53.97 | 6.93 | 2.02 | 3.43 | 12   | sticki | 9  | 4  |
| 34 | R-21061 | VT-22        | 300 | 13.8 | 55   | 245   | 12.5 | 232.5  | 215.9 | 71.97 | 7.11 | 2.12 | 3.35 | 11   | sticki | 3  | 4  |
| 35 | R-21063 | S-78         | 300 | 13.5 | 51.1 | 248.9 | 17.1 | 231.8  | 204.6 | 68.20 | 7    | 2.03 | 3.45 | 10.9 | sticki | 4  | 5  |
| 36 | R-21065 | Kissan-222   | 300 | 13.6 | 53.5 | 246.5 | 18.3 | 228.2  | 206.2 | 68.73 | 6.92 | 2.05 | 3.38 | 9.6  | sticki | 4  | 4  |
| 37 | R-21067 | Raaj-313     | 300 | 13.2 | 52.4 | 247.6 | 15   | 232.6  | 160   | 53.33 | 6.49 | 1.93 | 3.36 | 10.6 | sticki | 10 | 4  |
| 38 | R-21069 | HDR-16       | 300 | 13.5 | 55.9 | 244.1 | 15.2 | 228.9  | 166.4 | 55.47 | 6.97 | 2.01 | 3.47 | 10.9 | sticki | 4  | 3  |
| 39 | R-21070 | IS-476       | 300 | 13.4 | 53.1 | 246.9 | 14.9 | 232    | 150.6 | 50.20 | 7.1  | 2.08 | 3.41 | 11.2 | sticki | 2  | 1  |
| 40 | R-21071 | Muhafiz-555  | 300 | 12.4 | 61.7 | 238.3 | 13.8 | 224.5  | 163.5 | 54.50 | 7    | 2.01 | 3.48 | 11.2 | sticki | 3  | 4  |
| 41 | R-21073 | EG-1906      | 300 | 13   | 54.1 | 245.9 | 12.5 | 233.4  | 155   | 51.67 | 6.89 | 1.93 | 3.57 | 10.7 | sticki | 4  | 6  |

|    |         |                   |     |      |      |       |      |        |       |       |      |      |      |      |        |    |    |
|----|---------|-------------------|-----|------|------|-------|------|--------|-------|-------|------|------|------|------|--------|----|----|
| 42 | R-21075 | LPSA-09           | 300 | 12.7 | 51.5 | 248.5 | 12.5 | 236    | 160   | 53.33 | 6.8  | 1.92 | 3.54 | 10.5 | sticki | 12 | 3  |
| 43 | R-21077 | Tara-2002         | 300 | 12.9 | 59.7 | 240.3 | 19.2 | 221.1  | 155.5 | 51.83 | 7.01 | 2.1  | 3.34 | 10.2 | Sticki | 3  | 2  |
| 44 | R-21079 | XLCS-1813         | 300 | 12.6 | 52.8 | 247.2 | 17.5 | 229.7  | 158   | 52.67 | 6.65 | 2.02 | 3.29 | 10.8 | sticki | 7  | 6  |
| 45 | R-21081 | GNV-53<br>(Check) | 300 | 13.6 | 51.4 | 248.6 | 19.2 | 229.4  | 195.9 | 65.30 | 6.66 | 2.02 | 3.30 | 9.7  | sticki | 8  | 4  |
| 46 | R-21083 | EG-1908           | 300 | 12.8 | 50.6 | 249.4 | 18.6 | 230.8  | 180   | 60.00 | 7.21 | 2.02 | 3.57 | 12   | sticki | 9  | 5  |
| 47 | R-21085 | Tara-2111         | 300 | 12.9 | 56.6 | 243.4 | 18.3 | 225.1  | 192.7 | 64.23 | 6.87 | 2.04 | 3.37 | 11   | Sticki | 3  | 3  |
| 48 | R-21088 | TEG-111           | 300 | 13.5 | 55   | 245   | 12.3 | 232.7  | 178.6 | 59.53 | 6.57 | 2.02 | 3.25 | 10.2 | sticki | 3  | 5  |
| 49 | R-21090 | LPSA-01           | 300 | 13.4 | 52.1 | 247.9 | 26.7 | 221.20 | 158.8 | 52.93 | 6.72 | 1.99 | 3.38 | 10.7 | sticki | 8  | 3  |
| 50 | R-21091 | Noor-444          | 300 | 12.7 | 54   | 246   | 15.8 | 230.20 | 156   | 52.00 | 6.84 | 2.2  | 3.11 | 10.4 | sticki | 4  | 3  |
| 51 | R-21093 | Raaj-555          | 300 | 12.5 | 62   | 238   | 21.6 | 216.4  | 151   | 50.33 | 6.67 | 1.98 | 3.37 | 10.2 | sticki | 2  | 2  |
| 52 | R-21095 | GS-1199           | 300 | 13.3 | 47.4 | 252.6 | 17.2 | 235.4  | 191.2 | 63.73 | 6.56 | 1.94 | 3.38 | 10.4 | sticki | 3  | 3  |
| 53 | R-21097 | Rawayat-245       | 300 | 13.1 | 52.8 | 247.2 | 16.4 | 230.8  | 151.2 | 50.40 | 6.86 | 2    | 3.43 | 11.5 | sticki | 3  | 2  |
| 54 | R-21099 | IS-696            | 300 | 12.4 | 53.8 | 246.2 | 13.1 | 233.1  | 169.6 | 56.53 | 6.88 | 1.98 | 3.47 | 11.4 | sticki | 3  | 3  |
| 55 | R-21100 | EG-1907           | 300 | 13.1 | 65.3 | 234.7 | 14.3 | 220.4  | 187.6 | 62.53 | 6.41 | 1.94 | 3.30 | 9.7  | sticki | 6  | 4  |
| 56 | R-21101 | MAITA-125         | 300 | 12.4 | 58   | 242   | 23.2 | 218.8  | 152.4 | 50.80 | 6.9  | 2.04 | 3.38 | 10.6 | sticki | 5  | 6  |
| 57 | R-21103 | Tara-2112         | 300 | 12.3 | 54   | 246   | 15   | 231    | 184.8 | 61.60 | 6.96 | 2.19 | 3.18 | 10.4 | sticki | 5  | 3  |
| 58 | R-21105 | KS-2153           | 300 | 12.4 | 52.4 | 247.6 | 16.3 | 231.3  | 200.9 | 66.97 | 6.85 | 2.04 | 3.36 | 11   | sticki | 10 | 6  |
| 59 | R-21107 | EG-1901           | 300 | 13.5 | 52.2 | 247.8 | 15   | 232.8  | 204   | 68.00 | 6.82 | 2.12 | 3.22 | 10.2 | sticki | 3  | 4  |
| 60 | R-21109 | Kissan-363        | 300 | 13.3 | 55.6 | 244.4 | 13.1 | 231.3  | 197.5 | 65.83 | 6.87 | 2.2  | 3.12 | 11.9 | sticki | 3  | 5  |
| 61 | R-21111 | LPSA-08           | 300 | 12.5 | 53.3 | 246.7 | 13.4 | 233.3  | 171.8 | 57.27 | 6.67 | 2.04 | 3.27 | 11.3 | sticki | 5  | 4  |
| 62 | R-21113 | CD-910            | 300 | 13.3 | 56.6 | 243.4 | 10.8 | 232.6  | 201   | 67.00 | 6.4  | 1.84 | 3.48 | 9.9  | sticki | 5  | 6  |
| 63 | R-21115 | Noor-111          | 300 | 13.7 | 60   | 240   | 18.4 | 221.6  | 168.8 | 56.27 | 7.26 | 2.04 | 3.56 | 12   | sticki | 4  | 3  |
| 64 | R-21117 | GS-1122           | 300 | 13.2 | 54.3 | 245.7 | 16.4 | 229.3  | 216   | 72.00 | 6.75 | 2.08 | 3.25 | 9.9  | sticki | 20 | 12 |

|    |         |                     |     |      |      |       |      |        |       |       |      |      |      |      |        |    |    |
|----|---------|---------------------|-----|------|------|-------|------|--------|-------|-------|------|------|------|------|--------|----|----|
| 65 | R-21119 | Grace-2             | 300 | 12.1 | 57.6 | 242.4 | 19.2 | 223.2  | 185.6 | 61.87 | 6.79 | 1.87 | 3.63 | 11   | sticki | 5  | 11 |
| 66 | R-21120 | EG-1904             | 300 | 14.3 | 61.2 | 238.8 | 10.8 | 228    | 215   | 71.67 | 6.79 | 2.03 | 3.34 | 10.2 | sticki | 9  | 6  |
| 67 | R-21121 | Tara-2001           | 300 | 12.9 | 61.1 | 238.9 | 12.9 | 226.00 | 204   | 68.00 | 6.68 | 2.03 | 3.29 | 10.5 | sticki | 4  | 3  |
| 68 | R-21122 | KS-2151             | 300 | 13.7 | 57.8 | 242.2 | 18.7 | 223.5  | 150.7 | 50.23 | 6.73 | 2.03 | 3.32 | 9.9  | sticki | 7  | 6  |
| 69 | R-21123 | XLCS-3463           | 300 | 12.5 | 55.7 | 244.3 | 17.7 | 226.6  | 176   | 58.67 | 6.82 | 2.02 | 3.38 | 11   | sticki | 8  | 5  |
| 70 | R-21125 | GIR-1803            | 300 | 12.1 | 58.4 | 241.6 | 12.7 | 228.9  | 150.2 | 50.07 | 6.57 | 1.95 | 3.37 | 10.3 | sticki | 10 | 19 |
| 71 | R-21127 | LPSA-06             | 300 | 13.4 | 55.9 | 244.1 | 11.8 | 232.3  | 223.5 | 74.50 | 6.96 | 1.77 | 3.93 | 10.6 | sticki | 7  | 7  |
| 72 | R-21129 | Ababeel-785         | 300 | 12.8 | 57.8 | 242.2 | 19.4 | 222.8  | 157   | 52.33 | 7.03 | 2.11 | 3.33 | 11.1 | Sticki | 2  | 2  |
| 73 | R-21131 | LPSA-02             | 300 | 12.7 | 51.9 | 248.1 | 17.9 | 230.2  | 204.7 | 68.23 | 6.7  | 1.96 | 3.42 | 10.3 | Sticki | 2  | 6  |
| 74 | R-21133 | Bakhtawar-275       | 300 | 13.5 | 54.7 | 245.3 | 13.7 | 231.6  | 192.2 | 64.07 | 6.7  | 1.97 | 3.40 | 10.5 | sticki | 14 | 8  |
| 75 | R-21135 | Shabnam-786         | 300 | 13.1 | 59.3 | 240.7 | 20.5 | 220.2  | 151.4 | 50.47 | 6.76 | 1.91 | 3.54 | 11.3 | Sticki | 7  | 3  |
| 76 | R-21138 | Sina-500            | 300 | 13.1 | 59.8 | 240.2 | 13.8 | 226.4  | 162.2 | 54.07 | 6.98 | 2.22 | 3.14 | 10.5 | Sticki | 2  | 4  |
| 77 | R-21140 | Nawbahar Gold-2     | 300 | 12.4 | 61.2 | 238.8 | 18.6 | 220.2  | 150.2 | 50.07 | 7.11 | 1.74 | 4.09 | 11.2 | sticki | 3  | 4  |
| 78 | R-21141 | LUS-250             | 300 | 12.5 | 57.5 | 242.5 | 11.9 | 230.6  | 153.8 | 51.27 | 6.75 | 1.92 | 3.52 | 10.9 | sticki | 15 | 11 |
| 79 | R-21143 | Kissan-07           | 300 | 12.5 | 54   | 246   | 18.8 | 227.2  | 151   | 50.33 | 6.79 | 1.96 | 3.46 | 11.4 | sticki | 2  | 7  |
| 80 | R-21145 | TEG-786             | 300 | 13.2 | 52.7 | 247.3 | 18.9 | 228.4  | 198.4 | 66.13 | 6.45 | 1.93 | 3.34 | 11.1 | Sticki | 3  | 7  |
| 81 | R-21147 | SC-138              | 300 | 12.6 | 51.3 | 248.7 | 19.8 | 228.9  | 164.2 | 54.73 | 6.92 | 2.2  | 3.15 | 10.6 | Sticki | 5  | 4  |
| 82 | R-21149 | Riscer              | 300 | 12.1 | 62.3 | 237.7 | 17.4 | 220.3  | 164   | 54.67 | 6.85 | 1.96 | 3.49 | 11   | sticki | 3  | 4  |
| 83 | R-21150 | Diamond-121 (Check) | 300 | 12.4 | 55.1 | 244.9 | 20.3 | 224.6  | 153   | 51.00 | 6.96 | 2.01 | 3.46 | 11.5 | sticki | 4  | 12 |
| 84 | R-21151 | HP-1                | 300 | 13   | 53.9 | 246.1 | 16.3 | 229.8  | 155   | 51.67 | 7.3  | 2.13 | 3.43 | 12.9 | sticki | 4  | 12 |
| 85 | R-21153 | DM-999              | 300 | 13   | 72.2 | 227.8 | 14.3 | 213.5  | 160.2 | 53.40 | 6.92 | 2.28 | 3.04 | 10.3 | sticki | 4  | 8  |
| 86 | R-21155 | Nawbahar gold-1     | 300 | 12.2 | 60.2 | 239.8 | 23   | 216.8  | 151.8 | 50.60 | 6.61 | 1.64 | 4.03 | 10.2 | Sticki | 3  | 6  |

|     |         |               |     |      |      |       |      |        |       |       |      |      |      |      |        |    |    |
|-----|---------|---------------|-----|------|------|-------|------|--------|-------|-------|------|------|------|------|--------|----|----|
| 87  | R-21157 | Nawbahar-2102 | 300 | 13.2 | 51.5 | 248.5 | 25.6 | 222.9  | 175.4 | 58.47 | 6.73 | 2.01 | 3.35 | 10.8 | sticki | 4  | 9  |
| 88  | R-21159 | Bakhtawar-281 | 300 | 12.9 | 52.7 | 247.3 | 21.6 | 225.7  | 167   | 55.67 | 6.48 | 1.99 | 3.26 | 11   | Sticki | 3  | 7  |
| 89  | R-21161 | Badbaan-06    | 300 | 13   | 50.2 | 249.8 | 18.6 | 231.2  | 157   | 52.33 | 6.88 | 1.97 | 3.49 | 10.4 | sticki | 12 | 18 |
| 90  | R-21165 | ASW-503       | 300 | 11.7 | 51.3 | 248.7 | 22.3 | 226.4  | 159.3 | 53.10 | 6.82 | 2.2  | 3.10 | 11   | sticki | 3  | 5  |
| 91  | R-21170 | JJR-51        | 300 | 13.4 | 54   | 246   | 12.1 | 233.9  | 185   | 61.67 | 6.49 | 1.94 | 3.35 | 9.9  | sticki | 3  | 3  |
| 92  | R-21173 | SC-170        | 300 | 12.3 | 57.4 | 242.6 | 11.6 | 231    | 209   | 69.67 | 6.64 | 1.96 | 3.39 | 10.6 | sticki | 17 | 4  |
| 93  | R-21175 | Sina-250      | 300 | 12.9 | 56.1 | 243.9 | 14.3 | 229.6  | 176.7 | 58.90 | 7.16 | 2.02 | 3.54 | 11.5 | sticki | 3  | 3  |
| 94  | R-21179 | FMC-4         | 300 | 12.6 | 53.7 | 246.3 | 14.3 | 232    | 201.4 | 67.13 | 6.94 | 2.01 | 3.45 | 11.2 | sticki | 11 | 7  |
| 95  | R-21180 | Nawbahar-2101 | 300 | 11.5 | 54.2 | 245.8 | 11.3 | 234.5  | 169.8 | 56.60 | 6.88 | 2.12 | 3.25 | 10.6 | sticki | 3  | 8  |
| 96  | R-21181 | AS-525        | 300 | 12.7 | 52.9 | 247.1 | 11.6 | 235.50 | 162.6 | 54.20 | 6.98 | 2.2  | 3.17 | 10.6 | sticki | 4  | 3  |
| 97  | R-21183 | LS-115        | 300 | 12.6 | 53.2 | 246.8 | 17.7 | 229.1  | 212   | 70.67 | 6.79 | 2.08 | 3.26 | 10.5 | sticki | 4  | 2  |
| 98  | R-21185 | Sundar-786    | 300 | 12.4 | 53.1 | 246.9 | 22.1 | 224.8  | 166.3 | 55.43 | 6.98 | 2.1  | 3.32 | 11   | Sticki | 2  | 12 |
| 99  | R-21187 | SG-415        | 300 | 13.6 | 53.1 | 246.9 | 13.7 | 233.2  | 185.6 | 61.87 | 6.82 | 2.16 | 3.16 | 10.4 | sticki | 7  | 5  |
| 100 | R-21189 | Badbaan-07    | 300 | 12   | 57.3 | 242.7 | 14.9 | 227.8  | 174   | 58.00 | 6.48 | 1.84 | 3.52 | 10.2 | sticki | 16 | 6  |
| 101 | R-21190 | SG-436        | 300 | 13.1 | 49.8 | 250.2 | 20.7 | 229.5  | 176.7 | 58.90 | 6.72 | 2.16 | 3.11 | 11   | Sticki | 2  | 7  |
| 102 | R-21191 | JJR-88        | 300 | 12.4 | 52.1 | 247.9 | 18.3 | 229.6  | 180   | 60.00 | 6.38 | 1.91 | 3.34 | 10   | sticki | 4  | 9  |
| 103 | R-21193 | ASW-505       | 300 | 13.2 | 53   | 247   | 20.2 | 226.8  | 153.6 | 51.20 | 6.84 | 2.02 | 3.39 | 10.7 | sticki | 6  | 14 |
| 104 | R-21194 | DM-111        | 300 | 13.4 | 65.1 | 234.9 | 13.4 | 221.50 | 218   | 72.67 | 6.5  | 1.76 | 3.69 | 10.5 | sticki | 3  | 3  |
| 105 | R-21195 | FMC-3         | 300 | 12.8 | 57.1 | 242.9 | 12.6 | 230.3  | 186.3 | 62.10 | 6.81 | 2.01 | 3.39 | 11   | sticki | 7  | 4  |
| 106 | R-21197 | US-125        | 300 | 14   | 55.6 | 244.4 | 15.2 | 229.2  | 213   | 71.00 | 6.68 | 1.98 | 3.37 | 10.2 | sticki | 10 | 5  |
| 107 | R-21199 | SC-156        | 300 | 13.3 | 53.5 | 246.5 | 12.6 | 233.9  | 153   | 51.00 | 6.85 | 2.19 | 3.13 | 10.5 | sticki | 9  | 8  |
| 108 | R-21200 | Prime-433     | 300 | 13   | 51.6 | 248.4 | 13.4 | 235    | 200   | 66.67 | 7.14 | 2.09 | 3.42 | 11.2 | sticki | 2  | 3  |
| 109 | R-21201 | IS-81         | 300 | 13.3 | 63.4 | 236.6 | 18.1 | 218.5  | 165   | 55.00 | 6.84 | 2.05 | 3.34 | 10.4 | sticki | 6  | 4  |
| 110 | R-21203 | Sitra-404     | 300 | 12.9 | 52.6 | 247.4 | 13   | 234.4  | 198   | 66.00 | 6.36 | 1.8  | 3.53 | 10   | sticki | 10 | 4  |

|     |         |              |     |      |      |       |      |        |       |       |      |      |      |      |        |    |    |
|-----|---------|--------------|-----|------|------|-------|------|--------|-------|-------|------|------|------|------|--------|----|----|
| 111 | R-21205 | FB-103       | 300 | 12.5 | 54.3 | 245.7 | 15.2 | 230.5  | 206   | 68.67 | 6.84 | 2.05 | 3.34 | 10.2 | sticki | 10 | 5  |
| 112 | R-21207 | HP-2         | 300 | 12.8 | 57   | 243   | 19.3 | 223.7  | 180   | 60.00 | 6.94 | 2.09 | 3.32 | 11.1 | sticki | 5  | 4  |
| 113 | R-21209 | Rachana-515  | 300 | 12.7 | 53   | 247   | 13.6 | 233.4  | 159.4 | 53.13 | 6.85 | 2.22 | 3.09 | 11   | sticki | 3  | 6  |
| 114 | R-21211 | MS-333       | 300 | 11.4 | 55.9 | 244.1 | 13.3 | 230.8  | 187   | 62.33 | 6.75 | 2.06 | 3.28 | 11.1 | sticki | 3  | 2  |
| 115 | R-21212 | Mumtaaz-1473 | 300 | 11.7 | 57   | 243   | 13.9 | 229.1  | 171.7 | 57.23 | 6.82 | 1.82 | 3.75 | 10.9 | sticki | 5  | 2  |
| 116 | R-21213 | Anza         | 300 | 12.7 | 58.5 | 241.5 | 14   | 227.5  | 173   | 57.67 | 6.68 | 1.96 | 3.41 | 10.8 | sticki | 6  | 7  |
| 117 | R-21215 | FB-1402      | 300 | 12.6 | 55.6 | 244.4 | 16.8 | 227.6  | 225   | 75.00 | 6.73 | 1.96 | 3.43 | 11   | sticki | 6  | 5  |
| 118 | R-21217 | Uqab-101     | 300 | 10.2 | 73.6 | 226.4 | 22   | 204.4  | 156.2 | 52.07 | 6.68 | 2.02 | 3.31 | 10.4 | sticki | 3  | 5  |
| 119 | R-21219 | Bankuit-128  | 300 | 12.5 | 56.5 | 243.5 | 12   | 231.5  | 171.8 | 57.27 | 6.97 | 1.96 | 3.56 | 10   | sticki | 6  | 12 |
| 120 | R-21220 | PT-918       | 300 | 12.3 | 51.3 | 248.7 | 10.2 | 238.5  | 222.3 | 74.10 | 6.66 | 1.98 | 3.36 | 9.9  | sticki | 8  | 5  |
| 121 | R-21222 | CMS-404      | 300 | 13.3 | 60   | 240   | 15.8 | 224.2  | 179.8 | 59.93 | 6.56 | 1.99 | 3.30 | 10.2 | sticki | 4  | 3  |
| 122 | R-21225 | ME-444       | 300 | 12.2 | 62.8 | 237.2 | 23.6 | 213.6  | 153   | 51.00 | 6.96 | 2.05 | 3.40 | 10.7 | sticki | 3  | 3  |
| 123 | R-21227 | PT-930       | 300 | 12.9 | 53.6 | 246.4 | 30.2 | 216.2  | 178.2 | 59.40 | 6.9  | 1.98 | 3.48 | 11.5 | sticki | 3  | 6  |
| 124 | R-21229 | FB-1802      | 300 | 12.1 | 56.9 | 243.1 | 17.3 | 225.8  | 154.2 | 51.40 | 6.81 | 2.02 | 3.37 | 10   | Sticki | 2  | 10 |
| 125 | R-21230 | FB-101       | 300 | 12.6 | 49.8 | 250.2 | 25.6 | 224.60 | 158   | 52.67 | 6.87 | 2.03 | 3.38 | 10.2 | sticki | 3  | 4  |
| 126 | R-21232 | Super Sultan | 300 | 12.9 | 50.8 | 249.2 | 13.3 | 235.9  | 181   | 60.33 | 6.9  | 2.26 | 3.05 | 11.6 | sticki | 6  | 8  |
| 127 | R-21233 | HP-3         | 300 | 13   | 59.6 | 240.4 | 16.4 | 224    | 194   | 64.67 | 6.6  | 1.75 | 3.77 | 10.2 | sticki | 25 | 11 |
| 128 | R-21235 | Rachana-414  | 300 | 11.2 | 69.4 | 230.6 | 20   | 210.6  | 151.4 | 50.47 | 6.89 | 1.88 | 3.66 | 11   | sticki | 4  | 9  |
| 129 | R-21237 | Bankuit-125  | 300 | 11.5 | 55   | 245   | 11.6 | 233.4  | 152   | 50.67 | 6.98 | 2.12 | 3.29 | 10.5 | sticki | 5  | 4  |
| 130 | R-21239 | MWK          | 300 | 12.1 | 62.2 | 237.8 | 14.3 | 223.5  | 166   | 55.33 | 6.88 | 2.02 | 3.41 | 11.4 | sticki | 8  | 4  |
| 131 | R-21240 | Tass         | 300 | 12.3 | 57.5 | 242.5 | 18.2 | 224.3  | 186.8 | 62.27 | 6.55 | 1.96 | 3.34 | 10.1 | sticki | 4  | 3  |
| 132 | R-21241 | 1122         | 300 | 12.2 | 54.4 | 245.6 | 19.6 | 226    | 180   | 60.00 | 6.81 | 2.04 | 3.34 | 10.4 | sticki | 7  | 9  |
| 133 | R-21242 | YG-21        | 300 | 12.5 | 53.3 | 246.7 | 18.9 | 227.8  | 157   | 52.33 | 6.63 | 1.94 | 3.42 | 9.8  | sticki | 12 | 11 |
| 134 | R-21244 | Manira-786   | 300 | 12.4 | 51.8 | 248.2 | 13.9 | 234.3  | 205   | 68.33 | 7.01 | 2    | 3.51 | 10.6 | sticki | 6  | 7  |

|            |         |                  |     |      |      |       |      |       |           |       |      |      |      |      |        |    |    |
|------------|---------|------------------|-----|------|------|-------|------|-------|-----------|-------|------|------|------|------|--------|----|----|
| <b>135</b> | R-21245 | Arisco-88        | 300 | 11.6 | 57.4 | 242.6 | 14.2 | 228.4 | 194.<br>6 | 64.87 | 6.87 | 2    | 3.44 | 9.2  | sticki | 26 | 13 |
| <b>136</b> | R-21247 | Bankhuit-<br>130 | 300 | 12.7 | 57.2 | 242.8 | 11.9 | 230.9 | 155       | 51.67 | 6.89 | 2.02 | 3.41 | 10.9 | sticki | 14 | 4  |
| <b>137</b> | R-21249 | Tezro-<br>121A   | 300 | 12.6 | 54.1 | 245.9 | 21.2 | 224.7 | 173.<br>6 | 57.87 | 6.85 | 2.21 | 3.10 | 11.1 | sticki | 6  | 4  |

**Abbreviations**

BR= Brown Rice

TMR= Total Milled Rice

HR= Head Rice

CGL= Cooked Grain Length

B= Bursting Upon Cooking

E/ R= Elongation Ratio



Supplementary Table S3: SSR markers used for rice hybrids for their Genetic diversity study

| S. No. | Primer Name | Chromosomal location | Annealing temp °C | Primer Sequence (5'-3')                               | Fluorescence | Product size | S. No. | Primer Name | Chromosomal location | Annealing temp °C | Primer Sequence (5'-3')                              | Fluorescence | Product size |
|--------|-------------|----------------------|-------------------|-------------------------------------------------------|--------------|--------------|--------|-------------|----------------------|-------------------|------------------------------------------------------|--------------|--------------|
| 1      | RM583       | 1                    | 55                | F: agatccatccctgtggagag<br>R: gcgaactcgcgtgttaatc     | VIC          | 180-195      | 25     | RM493       | 1                    | 55                | F: tagctccaacaggatcgacc<br>R: gtacgtaaaccggaaggtg    | VIC          | 210-264      |
| 2      | RM71        | 2                    | 55                | F: ctagaggcgaaaacgagatg<br>R: ggggtggcgaggtataatg     | FAM          | 122-148      | 26     | RM561       | 2                    | 55                | F: gagctgttttgactacggc<br>R: gagtagctttctccacccc     | FAM          | 185-195      |
| 3      | RM85        | 3                    | 55                | F: ccaaagatgaacctggattg<br>R: gcacaaggtgagcagtc       | FAM          | 80-104       | 27     | RM8277      | 3                    | 55                | F: agcacaagtaggtgcattc<br>R: atttgcctgtgatgaatagc    | NED          | 165-212      |
| 4      | RM471       | 4                    | 55                | F: acgcacaagcagatgatgag<br>R: ggggagaagacgaatgtttgc   | VIC          | 102-114      | 28     | RM551       | 4                    | 55                | F: agcccagactagctgattg<br>R: gaaggcgaggaagatcacag    | FAM          | 184-190      |
| 5      | RM274       | 5                    | 55                | F: cctcgcttatgagagcttcg<br>R: cttctccatcactcccatgg    | VIC          | 149-162      | 29     | RM598       | 5                    | 55                | F: gaatcgcacacgtgatgaac<br>R: atgcgactgatcggtactcc   | FAM          | 153-162      |
| 6      | RM190       | 6                    | 55                | F: cttgtctatctcaagacac<br>R: ttgcagatgttcttctgatg     | VIC          | 109-122      | 30     | RM176       | 6                    | 67                | F: cggctcccgtacgactctcc<br>R: agcgatgcgctggaagaggtgc | FAM          | 133-136      |
| 7      | RM236       | 7                    | 55                | F: cttacagagaaacggcatcg<br>R: gctggtttgttcagggtcg     | VIC          | 151-166      | 31     | RM432       | 7                    | 55                | F: ttctgtctcacgtggattg<br>R: agctgcgtacgtgatgaatg    | PET          | 168-188      |
| 8      | RM72        | 8                    | 55                | F: ccggcgataaaacaatgag<br>R: gcatcggtcctaactaaggg     | PET          | 163-190      | 32     | RM331       | 8                    | 55                | F: gaaccagaggacaaaaatgc<br>R: catcatacatttgcagccag   | NED          | 151-171      |
| 9      | RM219       | 9                    | 55                | F: cgtcggatgatgtaaagcct<br>R: catatcggcattcgctg       | FAM          | 194-215      | 33     | OSR28       | 9                    | 55                | F: agcagctatagcttagctgg<br>R: actgcacatgagcagagaca   | NED          | 132-169      |
| 10     | RM311       | 10                   | 55                | F: tggtagtataggtactaaacat<br>R: tccratcacatacaaacatac | VIC          | 160-182      | 34     | RM590       | 10                   | 55                | F: catctccgctctccatgc<br>R: ggagttgggtcttcttcg       | PET          | 139-146      |
| 11     | RM209       | 11                   | 55                | F: atatgagttgctgtcgtcg<br>R: caacttgatcctccccctcc     | VIC          | 125-160      | 35     | RM21        | 11                   | 55                | F: acagtattccgtaggcacgg<br>R: gctccatgagggtggtagag   | FAM          | 128-260      |
| 12     | RM19        | 12                   | 55                | F: caaaaacagagcagatgac<br>R: ctcaagatggagccaaga       | PET          | 216-253      | 36     | RM3331      | 12                   | 50                | F: cctcctcatgagctaagtc<br>R: aggaggagcggatttctctc    | VIC          | 110-150      |
| 13     | RM1195      | 1                    | 55                | F: atggaccacaacgaccttc<br>R: cgactccctgtttctctgg      | FAM          | 142-152      | 37     | RM443       | 1                    | 55                | F: gatggttucatcggtacg<br>R: agtcccagaatgtctgttcg     | VIC          | 119-123      |
| 14     | RM208       | 2                    | 55                | F: tctgcaagcctgtctgatg<br>R: taagtcgacattgtgtggacc    | PET          | 167-182      | 38     | RM490       | 1                    | 55                | F: atctgcacactgcaaacacc<br>R: agcaagcagtgctttcagag   | FAM          | 92-99        |
| 15     | RM232       | 3                    | 55                | F: ccggtatccttcgatattgc<br>R: ccgacttttctcctgacg      | PET          | 141-161      | 39     | RM424       | 2                    | 55                | F: tttgtgctcaccagttgag<br>R: tggcgcatcatgtcatc       | NED          | 240-280      |

|    |       |    |    |                                                      |     |         |    |        |    |    |                                                     |     |         |
|----|-------|----|----|------------------------------------------------------|-----|---------|----|--------|----|----|-----------------------------------------------------|-----|---------|
| 16 | RM119 | 4  | 67 | F: catcccccctgctgctgctg<br>R: cgccggatgtgtgggactagcg | PET | 166-169 | 40 | RM423  | 2  | 55 | F: agcacccatgccttatgttg<br>R: cctttttcagtagccctccc  | FAM | 268-289 |
| 17 | RM267 | 5  | 55 | F: tgcagacatagagaaggaagtg<br>R: agcaacagcacaacttgatg | NED | 138-156 | 41 | RM571  | 3  | 55 | F: ggagggtgaaagcgaatcatg<br>R: cctgctgctctttcatcagc | FAM | 179-185 |
| 18 | RM253 | 6  | 55 | F: tccttcaagagtgc aaaacc<br>R: gcattgtcatgtcgaagcc   | PET | 133-142 | 42 | RM231  | 3  | 55 | F: ccagattatttcctgaggtc<br>R: cacttgcatagttctgcattg | PET | 186-194 |
| 19 | RM481 | 7  | 55 | F: tagctagccgattgaatggc<br>R: ctccacctcctatgttgttg   | FAM | 146-165 | 43 | RM567  | 4  | 55 | F: atcagggaaatcctgaaggg<br>R: ggaaggagcaatcaccactg  | PET | 248-260 |
| 20 | RM339 | 8  | 55 | F: gtaatcgatgctgtgggaag<br>R: gagtcatgtgatagccgatatg | VIC | 140-158 | 44 | RM289  | 5  | 55 | F: ttccatggcacacaagcc<br>R: ctgtgcacgaactccaag      | PET | 87-106  |
| 21 | RM278 | 9  | 55 | F: gtagtgagcctaacaataatc<br>R: tcaactcagcatctctgtcc  | NED | 128-142 | 45 | RM542  | 7  | 55 | F: tgaatcaagccctcactac<br>R: ctgcaacgagtaaggcagag   | VIC | 87-111  |
| 22 | RM258 | 10 | 55 | F: tgctgtatgtagctgcacc<br>R: tggcctttaagctgtcgc      | FAM | 128-146 | 46 | RM316  | 9  | 55 | F: ctagtgggcatac gatggc<br>R: acgcttatatgttacgtcaac | VIC | 196-202 |
| 23 | RM224 | 11 | 55 | F: atcgatcgatcttcacgagg<br>R: tgctataaaaggcattcggg   | NED | 120-155 | 47 | RM332  | 11 | 55 | F: gcgaaggcgaaggtgaag<br>R: catgagtatctcactcacc     | VIC | 162-167 |
| 24 | RM17  | 12 | 55 | F: tgccctgttttttctctc<br>R: ggtgatccttcccattca       | NED | 159-185 | 48 | RM7102 | 12 | 55 | F: taggagtgtttagagtcca<br>R: tcggtttgcttatacatcag   | PET | 170-190 |
